# Supplementary material for: Genome-wide profiling of RNA 2’-O-methylation in neurons and identification of orphan snoRNA targets
Source: bioRxiv preprint, doi:10.64898/2025.12.17.694928, version 1 (2025-12-17)
Supplement: Supplemental File 2 [file 694928_file07.xlsx]

## Sheet: H9
chr1	108700117	108700118	PRPF38B|ENST00000370021.1
chr1	151341719	151341720	RFX5|ENST00000290524.8
chr1	156320839	156320840	CCT3|ENST00000295688.7
chr1	205016339	205016340	NFASC|ENST00000339876.10
chr1	212898857	212898858	FLVCR1|ENST00000366971.8
chr1	237603275	237603276	RYR2|ENST00000366574.6
chr1	237603294	237603295	RYR2|ENST00000366574.6
chr1	243125389	243125390	CEP170|ENST00000366542.5
chr1	32043123	32043124	KHDRBS1|ENST00000327300.11
chr1	91387230	91387231	HFM1|ENST00000370425.7
chr1	91387254	91387255	HFM1|ENST00000370425.7
chr1	91387259	91387260	HFM1|ENST00000370425.7
chr1	91387297	91387298	HFM1|ENST00000370425.7
chr1	91387361	91387362	HFM1|ENST00000370425.7
chr1	91387383	91387384	HFM1|ENST00000370425.7
chr1	91387447	91387448	HFM1|ENST00000370425.7
chr1	91387557	91387558	HFM1|ENST00000370425.7
chr10	103289367	103289368	INA|ENST00000369849.8
chr10	129840396	129840397	EBF3|ENST00000368648.7
chr10	15211917	15211918	FAM171A1|ENST00000378116.8
chr11	22379278	22379279	SLC17A6|ENST00000263160.3
chr11	45242661	45242662	SYT13|ENST00000020926.7
chr11	73677372	73677373	RAB6A|ENST00000310653.10
chr12	20551471	20551472	PDE3A|ENST00000359062.3
chr12	20551473	20551474	PDE3A|ENST00000359062.3
chr12	20551528	20551529	PDE3A|ENST00000359062.3
chr12	20551536	20551537	PDE3A|ENST00000359062.3
chr12	48938787	48938788	AC073610.5|ENST00000537495.2
chr12	48938787	48938788	ARF3|ENST00000256682.8
chr12	48938787	48938788	RP11-302B13.5|ENST00000398092.4
chr12	49184896	49184897	TUBA1A|ENST00000301071.11
chr12	49184929	49184930	TUBA1A|ENST00000301071.11
chr12	49185112	49185113	TUBA1A|ENST00000301071.11
chr12	49185113	49185114	TUBA1A|ENST00000301071.11
chr12	49185228	49185229	TUBA1A|ENST00000301071.11
chr12	49185350	49185351	TUBA1A|ENST00000301071.11
chr12	49185383	49185384	TUBA1A|ENST00000301071.11
chr12	49185634	49185635	TUBA1A|ENST00000301071.11
chr12	49185690	49185691	TUBA1A|ENST00000301071.11
chr12	49185692	49185693	TUBA1A|ENST00000301071.11
chr12	49185695	49185696	TUBA1A|ENST00000301071.11
chr12	49186323	49186324	TUBA1A|ENST00000301071.11
chr12	49186409	49186410	TUBA1A|ENST00000301071.11
chr12	49186413	49186414	TUBA1A|ENST00000301071.11
chr12	49269961	49269962	TUBA1C|ENST00000301072.10
chr12	49273013	49273014	TUBA1C|ENST00000301072.10
chr12	8932952	8932953	PHC1|ENST00000433083.6
chr13	45341089	45341090	TPT1|ENST00000616577.4
chr14	21521181	21521182	SALL2|ENST00000614342.1
chr14	23033580	23033581	PSMB5|ENST00000361611.10
chr14	51968179	51968180	GNG2|ENST00000335281.8
chr15	65877769	65877770	RAB11A|ENST00000261890.6
chr16	2056716	2056717	TSC2|ENST00000219476.7
chr16	54934364	54934365	IRX5|ENST00000394636.8
chr16	56451112	56451113	NUDT21|ENST00000300291.9
chr17	22524468	22524469	MTRNR2L1|ENST00000540040.2
chr17	43016009	43016010	VAT1|ENST00000355653.7
chr17	47669737	47669738	KPNB1|ENST00000290158.8
chr17	59693860	59693861	CLTC|ENST00000621829.4
chr17	76677513	76677514	MXRA7|ENST00000355797.7
chr17	81510124	81510125	ACTG1|ENST00000575842.5
chr17	81511039	81511040	ACTG1|ENST00000575842.5
chr18	35102047	35102048	MAPRE2|ENST00000436190.6
chr19	1776256	1776257	ONECUT3|ENST00000382349.4
chr19	17861456	17861457	RPL18A|ENST00000600147.5
chr19	18617098	18617099	TMEM59L|ENST00000600490.5
chr19	35658611	35658612	COX6B1|ENST00000246554.7
chr19	55669159	55669160	U2AF2|ENST00000450554.6
chr2	149025443	149025444	KIF5C|ENST00000435030.5
chr2	170966222	170966223	GORASP2|ENST00000234160.4
chr2	222943053	222943054	ACSL3|ENST00000357430.7
chr2	230819866	230819867	CAB39|ENST00000258418.9
chr2	65268999	65269000	ACTR2|ENST00000260641.9
chr2	70248464	70248465	TIA1|ENST00000433529.6
chr2	74529146	74529147	AUP1|ENST00000377526.3
chr2	84906617	84906618	TMSB10|ENST00000233143.5
chr20	2964958	2964959	PTPRA|ENST00000216877.10
chr20	32333287	32333288	KIF3B|ENST00000375712.3
chr20	34076709	34076710	RALY|ENST00000375114.7
chr20	34575189	34575190	PIGU|ENST00000217446.7
chr20	41092484	41092485	TOP1|ENST00000361337.2
chr22	37877857	37877858	EIF3L|ENST00000412331.6
chr22	41996143	41996144	SEPT3|ENST00000396425.7
chr3	101576492	101576493	PCNP|ENST00000265260.7
chr3	115720850	115720851	GAP43|ENST00000393780.3
chr3	127029952	127029953	PLXNA1|ENST00000393409.2
chr3	185657365	185657366	IGF2BP2|ENST00000382199.6
chr3	33622147	33622148	CLASP2|ENST00000399362.8
chr3	49012120	49012121	WDR6|ENST00000395474.7
chr3	49358141	49358142	GPX1|ENST00000419783.1
chr3	49532426	49532427	DAG1|ENST00000545947.5
chr3	98801644	98801645	DCBLD2|ENST00000326840.10
chr4	25002787	25002788	LGI2|ENST00000382114.8
chr4	98442243	98442244	RAP1GDS1|ENST00000408927.7
chr5	109335993	109335994	PJA2|ENST00000361189.6
chr5	11098697	11098698	CTNND2|ENST00000304623.12
chr5	137752073	137752074	HNRNPA0|ENST00000314940.6
chr5	141511425	141511426	PCDHGA10|ENST00000398610.2
chr5	141511425	141511426	PCDHGA11|ENST00000398587.6
chr5	141511425	141511426	PCDHGA12|ENST00000252085.3
chr5	141511425	141511426	PCDHGA1|ENST00000517417.2
chr5	141511425	141511426	PCDHGA2|ENST00000394576.2
chr5	141511425	141511426	PCDHGA3|ENST00000253812.7
chr5	141511425	141511426	PCDHGA4|ENST00000571252.2
chr5	141511425	141511426	PCDHGA5|ENST00000518069.1
chr5	141511425	141511426	PCDHGA7|ENST00000518325.1
chr5	141511425	141511426	PCDHGA9|ENST00000573521.1
chr5	141511425	141511426	PCDHGB1|ENST00000523390.1
chr5	141511425	141511426	PCDHGB2|ENST00000522605.1
chr5	141511425	141511426	PCDHGB3|ENST00000576222.1
chr5	141511425	141511426	PCDHGB5|ENST00000617380.1
chr5	141511425	141511426	PCDHGB7|ENST00000398594.3
chr5	141511425	141511426	PCDHGC3|ENST00000308177.4
chr5	141511425	141511426	PCDHGC4|ENST00000306593.1
chr5	141511425	141511426	PCDHGC5|ENST00000252087.2
chr5	147400754	147400755	DPYSL3|ENST00000343218.9
chr5	150094915	150094916	CSF1R|ENST00000286301.7
chr5	17275660	17275661	BASP1|ENST00000322611.3
chr5	43231731	43231732	NIM1K|ENST00000512796.1
chr5	43495676	43495677	C5orf34|ENST00000306862.6
chr5	43496190	43496191	C5orf34|ENST00000306862.6
chr5	72888223	72888224	TNPO1|ENST00000337273.9
chr5	95517257	95517258	TTC37|ENST00000358746.6
chr6	144371006	144371007	UTRN|ENST00000367545.7
chr6	30643640	30643641	ATAT1|ENST00000376483.8
chr6	31639543	31639544	BAG6|ENST00000375964.10
chr6	31640854	31640855	BAG6|ENST00000375964.10
chr6	3227562	3227563	TUBB2B|ENST00000259818.7
chr6	73518600	73518601	EEF1A1|ENST00000316292.13
chr6	73519368	73519369	EEF1A1|ENST00000316292.13
chr6	73519396	73519397	EEF1A1|ENST00000316292.13
chr7	102476239	102476240	POLR2J|ENST00000292614.9
chr7	108510843	108510844	PNPLA8|ENST00000426128.6
chr7	76327299	76327300	YWHAG|ENST00000307630.4
chr8	102836317	102836318	AZIN1|ENST00000337198.9
chr8	11847803	11847804	CTSB|ENST00000353047.10
chr8	24914381	24914382	NEFM|ENST00000221166.9
chr8	24914570	24914571	NEFM|ENST00000221166.9
chr8	24950994	24950995	NEFL|ENST00000610854.1
chr8	24956241	24956242	NEFL|ENST00000610854.1
chr8	69690117	69690118	SLCO5A1|ENST00000260126.8
chr8	69690127	69690128	SLCO5A1|ENST00000260126.8
chr8	69690143	69690144	SLCO5A1|ENST00000260126.8
chr8	69690155	69690156	SLCO5A1|ENST00000260126.8
chr8	69690173	69690174	SLCO5A1|ENST00000260126.8
chr8	69690201	69690202	SLCO5A1|ENST00000260126.8
chr8	69690212	69690213	SLCO5A1|ENST00000260126.8
chr8	69690217	69690218	SLCO5A1|ENST00000260126.8
chr8	69690224	69690225	SLCO5A1|ENST00000260126.8
chr8	69690234	69690235	SLCO5A1|ENST00000260126.8
chr8	69690324	69690325	SLCO5A1|ENST00000260126.8
chr8	69690341	69690342	SLCO5A1|ENST00000260126.8
chr8	73291175	73291176	RPL7|ENST00000396467.5
chr8	79665124	79665125	STMN2|ENST00000220876.11
chr9	131485107	131485108	PRRC2B|ENST00000357304.8
chrM	12599	12600	MT-ND5|ENST00000361567.2
chrM	4501	4502	MT-ND2|ENST00000361453.3
chrM	5922	5923	MT-CO1|ENST00000361624.2
chrM	6037	6038	MT-CO1|ENST00000361624.2
chrM	6388	6389	MT-CO1|ENST00000361624.2
chrM	6589	6590	MT-CO1|ENST00000361624.2
chrM	6661	6662	MT-CO1|ENST00000361624.2
chrM	6702	6703	MT-CO1|ENST00000361624.2
chrM	6776	6777	MT-CO1|ENST00000361624.2
chrM	6778	6779	MT-CO1|ENST00000361624.2
chrM	6810	6811	MT-CO1|ENST00000361624.2
chrM	6813	6814	MT-CO1|ENST00000361624.2
chrM	6829	6830	MT-CO1|ENST00000361624.2
chrM	6832	6833	MT-CO1|ENST00000361624.2
chrM	6856	6857	MT-CO1|ENST00000361624.2
chrM	6861	6862	MT-CO1|ENST00000361624.2
chrM	6970	6971	MT-CO1|ENST00000361624.2
chrM	7037	7038	MT-CO1|ENST00000361624.2
chrM	7050	7051	MT-CO1|ENST00000361624.2
chrM	7056	7057	MT-CO1|ENST00000361624.2
chrM	7260	7261	MT-CO1|ENST00000361624.2
chrM	7296	7297	MT-CO1|ENST00000361624.2
chrM	7297	7298	MT-CO1|ENST00000361624.2
chrM	7300	7301	MT-CO1|ENST00000361624.2
chrM	7382	7383	MT-CO1|ENST00000361624.2
chrM	7435	7436	MT-CO1|ENST00000361624.2
chrM	7693	7694	MT-CO2|ENST00000361739.1
chrM	7779	7780	MT-CO2|ENST00000361739.1
chrM	9011	9012	MT-ATP6|ENST00000361899.2
chrX	91877021	91877022	PCDH11X|ENST00000373094.5
chrY	5098455	5098456	PCDH11Y|ENST00000400457.3

## Sheet: H9-smDEL
chr1	108700117	108700118	PRPF38B|ENST00000370021.1
chr1	109223999	109224000	SARS|ENST00000369923.4
chr1	145856779	145856780	PIAS3|ENST00000393045.6
chr1	151264027	151264028	PSMD4|ENST00000368884.7
chr1	151341719	151341720	RFX5|ENST00000290524.8
chr1	156320839	156320840	CCT3|ENST00000295688.7
chr1	205016339	205016340	NFASC|ENST00000339876.10
chr1	205076631	205076632	CNTN2|ENST00000331830.5
chr1	20742999	20743000	HP1BP3|ENST00000375003.6
chr1	212898857	212898858	FLVCR1|ENST00000366971.8
chr1	228097415	228097416	ARF1|ENST00000541182.1
chr1	236483350	236483351	EDARADD|ENST00000359362.5
chr1	237603074	237603075	RYR2|ENST00000366574.6
chr1	237603110	237603111	RYR2|ENST00000366574.6
chr1	237603275	237603276	RYR2|ENST00000366574.6
chr1	237603294	237603295	RYR2|ENST00000366574.6
chr1	243125389	243125390	CEP170|ENST00000366542.5
chr1	31180637	31180638	NKAIN1|ENST00000373736.6
chr1	32043123	32043124	KHDRBS1|ENST00000327300.11
chr1	36286842	36286843	THRAP3|ENST00000354618.9
chr1	91387230	91387231	HFM1|ENST00000370425.7
chr1	91387254	91387255	HFM1|ENST00000370425.7
chr1	91387259	91387260	HFM1|ENST00000370425.7
chr1	91387297	91387298	HFM1|ENST00000370425.7
chr1	91387361	91387362	HFM1|ENST00000370425.7
chr1	91387383	91387384	HFM1|ENST00000370425.7
chr1	91387447	91387448	HFM1|ENST00000370425.7
chr1	91387557	91387558	HFM1|ENST00000370425.7
chr10	100362166	100362167	SCD|ENST00000370355.2
chr10	100363501	100363502	SCD|ENST00000370355.2
chr10	101554077	101554078	BTRC|ENST00000370187.7
chr10	103289367	103289368	INA|ENST00000369849.8
chr10	129840396	129840397	EBF3|ENST00000368648.7
chr10	15211917	15211918	FAM171A1|ENST00000378116.8
chr10	31502440	31502441	ZEB1|ENST00000446923.6
chr10	48435917	48435918	MAPK8|ENST00000395611.7
chr10	69369266	69369267	HK1|ENST00000360289.6
chr10	73474981	73474982	PPP3CB|ENST00000360663.9
chr11	10508898	10508899	MTRNR2L8|ENST00000536684.2
chr11	10508899	10508900	MTRNR2L8|ENST00000536684.2
chr11	1461479	1461480	BRSK2|ENST00000308219.13
chr11	22379278	22379279	SLC17A6|ENST00000263160.3
chr11	45242661	45242662	SYT13|ENST00000020926.7
chr11	46657124	46657125	ATG13|ENST00000359513.8
chr11	61967385	61967386	FTH1|ENST00000273550.11
chr11	66646231	66646232	RBM4|ENST00000409406.1
chr11	70436502	70436503	CTTN|ENST00000346329.7
chr11	73677372	73677373	RAB6A|ENST00000310653.10
chr12	19457124	19457125	AEBP2|ENST00000398864.7
chr12	20551471	20551472	PDE3A|ENST00000359062.3
chr12	20551473	20551474	PDE3A|ENST00000359062.3
chr12	20551513	20551514	PDE3A|ENST00000359062.3
chr12	20551528	20551529	PDE3A|ENST00000359062.3
chr12	20551536	20551537	PDE3A|ENST00000359062.3
chr12	48938787	48938788	AC073610.5|ENST00000537495.2
chr12	48938787	48938788	ARF3|ENST00000256682.8
chr12	48938787	48938788	RP11-302B13.5|ENST00000398092.4
chr12	49184896	49184897	TUBA1A|ENST00000301071.11
chr12	49184928	49184929	TUBA1A|ENST00000301071.11
chr12	49184929	49184930	TUBA1A|ENST00000301071.11
chr12	49184960	49184961	TUBA1A|ENST00000301071.11
chr12	49184970	49184971	TUBA1A|ENST00000301071.11
chr12	49185006	49185007	TUBA1A|ENST00000301071.11
chr12	49185011	49185012	TUBA1A|ENST00000301071.11
chr12	49185013	49185014	TUBA1A|ENST00000301071.11
chr12	49185016	49185017	TUBA1A|ENST00000301071.11
chr12	49185071	49185072	TUBA1A|ENST00000301071.11
chr12	49185112	49185113	TUBA1A|ENST00000301071.11
chr12	49185113	49185114	TUBA1A|ENST00000301071.11
chr12	49185224	49185225	TUBA1A|ENST00000301071.11
chr12	49185225	49185226	TUBA1A|ENST00000301071.11
chr12	49185227	49185228	TUBA1A|ENST00000301071.11
chr12	49185228	49185229	TUBA1A|ENST00000301071.11
chr12	49185300	49185301	TUBA1A|ENST00000301071.11
chr12	49185347	49185348	TUBA1A|ENST00000301071.11
chr12	49185350	49185351	TUBA1A|ENST00000301071.11
chr12	49185354	49185355	TUBA1A|ENST00000301071.11
chr12	49185360	49185361	TUBA1A|ENST00000301071.11
chr12	49185363	49185364	TUBA1A|ENST00000301071.11
chr12	49185369	49185370	TUBA1A|ENST00000301071.11
chr12	49185372	49185373	TUBA1A|ENST00000301071.11
chr12	49185378	49185379	TUBA1A|ENST00000301071.11
chr12	49185381	49185382	TUBA1A|ENST00000301071.11
chr12	49185383	49185384	TUBA1A|ENST00000301071.11
chr12	49185446	49185447	TUBA1A|ENST00000301071.11
chr12	49185468	49185469	TUBA1A|ENST00000301071.11
chr12	49185634	49185635	TUBA1A|ENST00000301071.11
chr12	49185690	49185691	TUBA1A|ENST00000301071.11
chr12	49185692	49185693	TUBA1A|ENST00000301071.11
chr12	49185695	49185696	TUBA1A|ENST00000301071.11
chr12	49185696	49185697	TUBA1A|ENST00000301071.11
chr12	49185697	49185698	TUBA1A|ENST00000301071.11
chr12	49185720	49185721	TUBA1A|ENST00000301071.11
chr12	49185767	49185768	TUBA1A|ENST00000301071.11
chr12	49185776	49185777	TUBA1A|ENST00000301071.11
chr12	49185789	49185790	TUBA1A|ENST00000301071.11
chr12	49185834	49185835	TUBA1A|ENST00000301071.11
chr12	49185884	49185885	TUBA1A|ENST00000301071.11
chr12	49185920	49185921	TUBA1A|ENST00000301071.11
chr12	49185954	49185955	TUBA1A|ENST00000301071.11
chr12	49186318	49186319	TUBA1A|ENST00000301071.11
chr12	49186323	49186324	TUBA1A|ENST00000301071.11
chr12	49186328	49186329	TUBA1A|ENST00000301071.11
chr12	49186342	49186343	TUBA1A|ENST00000301071.11
chr12	49186362	49186363	TUBA1A|ENST00000301071.11
chr12	49186380	49186381	TUBA1A|ENST00000301071.11
chr12	49186381	49186382	TUBA1A|ENST00000301071.11
chr12	49186384	49186385	TUBA1A|ENST00000301071.11
chr12	49186409	49186410	TUBA1A|ENST00000301071.11
chr12	49186412	49186413	TUBA1A|ENST00000301071.11
chr12	49186413	49186414	TUBA1A|ENST00000301071.11
chr12	49186428	49186429	TUBA1A|ENST00000301071.11
chr12	49186614	49186615	TUBA1A|ENST00000301071.11
chr12	49186617	49186618	TUBA1A|ENST00000301071.11
chr12	49186655	49186656	TUBA1A|ENST00000301071.11
chr12	49186686	49186687	TUBA1A|ENST00000301071.11
chr12	49186689	49186690	TUBA1A|ENST00000301071.11
chr12	49186768	49186769	TUBA1A|ENST00000301071.11
chr12	49186769	49186770	TUBA1A|ENST00000301071.11
chr12	49186809	49186810	TUBA1A|ENST00000301071.11
chr12	49186826	49186827	TUBA1A|ENST00000301071.11
chr12	49188979	49188980	TUBA1A|ENST00000301071.11
chr12	49188983	49188984	TUBA1A|ENST00000301071.11
chr12	49269527	49269528	TUBA1C|ENST00000301072.10
chr12	49269607	49269608	TUBA1C|ENST00000301072.10
chr12	49269610	49269611	TUBA1C|ENST00000301072.10
chr12	49269942	49269943	TUBA1C|ENST00000301072.10
chr12	49269961	49269962	TUBA1C|ENST00000301072.10
chr12	49269966	49269967	TUBA1C|ENST00000301072.10
chr12	49272357	49272358	TUBA1C|ENST00000301072.10
chr12	49272452	49272453	TUBA1C|ENST00000301072.10
chr12	49272474	49272475	TUBA1C|ENST00000301072.10
chr12	49272521	49272522	TUBA1C|ENST00000301072.10
chr12	49273013	49273014	TUBA1C|ENST00000301072.10
chr12	56642554	56642555	ATP5B|ENST00000262030.7
chr12	57488176	57488177	ARHGAP9|ENST00000393797.6
chr12	6916511	6916512	ENO2|ENST00000535366.5
chr12	71755275	71755276	RAB21|ENST00000261263.4
chr12	8932952	8932953	PHC1|ENST00000433083.6
chr12	93575071	93575072	SOCS2|ENST00000548537.1
chr13	113094529	113094530	MCF2L|ENST00000397030.5
chr13	39343480	39343481	LHFP|ENST00000379589.3
chr13	45341089	45341090	TPT1|ENST00000616577.4
chr14	100291654	100291655	SLC25A29|ENST00000554912.1
chr14	21521181	21521182	SALL2|ENST00000614342.1
chr14	22905351	22905352	RBM23|ENST00000359890.7
chr14	23033580	23033581	PSMB5|ENST00000361611.10
chr14	51968179	51968180	GNG2|ENST00000335281.8
chr14	55043275	55043276	SOCS4|ENST00000395472.2
chr14	59596428	59596429	RTN1|ENST00000267484.9
chr14	69118657	69118658	DCAF5|ENST00000341516.9
chr14	81180039	81180040	GTF2A1|ENST00000553612.5
chr15	32641746	32641747	SCG5|ENST00000300175.8
chr15	38353522	38353523	SPRED1|ENST00000299084.8
chr15	47730286	47730287	SEMA6D|ENST00000316364.9
chr15	65877769	65877770	RAB11A|ENST00000261890.6
chr15	99713009	99713010	MEF2A|ENST00000354410.9
chr16	1320248	1320249	UBE2I|ENST00000355803.8
chr16	2056716	2056717	TSC2|ENST00000219476.7
chr16	29810527	29810528	MAZ|ENST00000219782.10
chr16	29814812	29814813	PRRT2|ENST00000300797.7
chr16	54934364	54934365	IRX5|ENST00000394636.8
chr16	56451112	56451113	NUDT21|ENST00000300291.9
chr16	89561653	89561654	RPL13|ENST00000311528.9
chr17	19906061	19906062	AKAP10|ENST00000225737.10
chr17	22524468	22524469	MTRNR2L1|ENST00000540040.2
chr17	35151215	35151216	UNC45B|ENST00000268876.9
chr17	4183524	4183525	ANKFY1|ENST00000341657.8
chr17	43016009	43016010	VAT1|ENST00000355653.7
chr17	46330736	46330737	LRRC37A|ENST00000320254.5
chr17	46548598	46548599	AC138645.1|ENST00000622488.5
chr17	46548598	46548599	AC138645.2|ENST00000329240.9
chr17	46548598	46548599	LRRC37A2|ENST00000576629.5
chr17	47669737	47669738	KPNB1|ENST00000290158.8
chr17	59693860	59693861	CLTC|ENST00000621829.4
chr17	63592729	63592730	DCAF7|ENST00000614556.4
chr17	64860685	64860686	LRRC37A3|ENST00000584306.5
chr17	7459415	7459416	ZBTB4|ENST00000311403.4
chr17	76677513	76677514	MXRA7|ENST00000355797.7
chr17	81510124	81510125	ACTG1|ENST00000575842.5
chr17	81511039	81511040	ACTG1|ENST00000575842.5
chr17	81511098	81511099	ACTG1|ENST00000575842.5
chr18	11884645	11884646	GNAL|ENST00000334049.10
chr18	11884645	11884646	MPPE1|ENST00000588072.5
chr18	35102047	35102048	MAPRE2|ENST00000436190.6
chr18	58400672	58400673	NEDD4L|ENST00000456986.5
chr19	1776256	1776257	ONECUT3|ENST00000382349.4
chr19	17861456	17861457	RPL18A|ENST00000600147.5
chr19	18617098	18617099	TMEM59L|ENST00000600490.5
chr19	35658611	35658612	COX6B1|ENST00000246554.7
chr19	3979351	3979352	EEF2|ENST00000309311.6
chr19	3979376	3979377	EEF2|ENST00000309311.6
chr19	54106889	54106890	NDUFA3|ENST00000485876.5
chr19	54460662	54460663	LENG8|ENST00000610347.1
chr19	55669159	55669160	U2AF2|ENST00000450554.6
chr19	5918600	5918601	RANBP3|ENST00000340578.10
chr2	129981253	129981254	RAB6C|ENST00000410061.3
chr2	131362580	131362581	WTH3DI|ENST00000623617.2
chr2	149025443	149025444	KIF5C|ENST00000435030.5
chr2	15623517	15623518	DDX1|ENST00000381341.6
chr2	1632261	1632262	PXDN|ENST00000252804.8
chr2	1643372	1643373	PXDN|ENST00000252804.8
chr2	170966222	170966223	GORASP2|ENST00000234160.4
chr2	201632086	201632087	TMEM237|ENST00000409444.6
chr2	207078740	207078741	KLF7|ENST00000309446.10
chr2	222943053	222943054	ACSL3|ENST00000357430.7
chr2	229769269	229769270	TRIP12|ENST00000283943.9
chr2	230819866	230819867	CAB39|ENST00000258418.9
chr2	230875772	230875773	ITM2C|ENST00000326427.10
chr2	231072335	231072336	PSMD1|ENST00000308696.10
chr2	25158792	25158793	EFR3B|ENST00000403714.7
chr2	27435171	27435172	NRBP1|ENST00000233557.7
chr2	65268999	65269000	ACTR2|ENST00000260641.9
chr2	69325068	69325069	GFPT1|ENST00000357308.8
chr2	70248464	70248465	TIA1|ENST00000433529.6
chr2	74529146	74529147	AUP1|ENST00000377526.3
chr2	84906617	84906618	TMSB10|ENST00000233143.5
chr2	8793859	8793860	KIDINS220|ENST00000256707.7
chr2	9584357	9584358	YWHAQ|ENST00000381844.8
chr20	25292435	25292436	PYGB|ENST00000216962.8
chr20	2964958	2964959	PTPRA|ENST00000216877.10
chr20	32001326	32001327	XKR7|ENST00000562532.2
chr20	32333287	32333288	KIF3B|ENST00000375712.3
chr20	34076709	34076710	RALY|ENST00000375114.7
chr20	34575189	34575190	PIGU|ENST00000217446.7
chr20	41092484	41092485	TOP1|ENST00000361337.2
chr20	44752753	44752754	RIMS4|ENST00000372851.7
chr20	51600320	51600321	ATP9A|ENST00000338821.5
chr20	5190983	5190984	CDS2|ENST00000460006.5
chr20	9538129	9538130	PAK5|ENST00000378429.3
chr21	33552709	33552710	SON|ENST00000356577.8
chr22	37632839	37632840	GGA1|ENST00000406772.5
chr22	37877857	37877858	EIF3L|ENST00000412331.6
chr22	38728134	38728135	GTPBP1|ENST00000216044.9
chr22	41675022	41675023	SNU13|ENST00000401959.5
chr22	41996143	41996144	SEPT3|ENST00000396425.7
chr22	46701688	46701689	CERK|ENST00000216264.12
chr22	49887510	49887511	ZBED4|ENST00000216268.5
chr3	101576492	101576493	PCNP|ENST00000265260.7
chr3	115720850	115720851	GAP43|ENST00000393780.3
chr3	12608828	12608829	RAF1|ENST00000251849.8
chr3	127029952	127029953	PLXNA1|ENST00000393409.2
chr3	143057322	143057323	U2SURP|ENST00000473835.6
chr3	15050157	15050158	MRPS25|ENST00000253686.6
chr3	184166910	184166911	DVL3|ENST00000313143.7
chr3	184315501	184315502	EIF4G1|ENST00000342981.8
chr3	185657365	185657366	IGF2BP2|ENST00000382199.6
chr3	23919376	23919377	RPL15|ENST00000456530.6
chr3	2902999	2903000	CNTN4|ENST00000397461.5
chr3	33622147	33622148	CLASP2|ENST00000399362.8
chr3	48660331	48660332	CELSR3|ENST00000164024.4
chr3	49012120	49012121	WDR6|ENST00000395474.7
chr3	49358141	49358142	GPX1|ENST00000419783.1
chr3	49532426	49532427	DAG1|ENST00000545947.5
chr3	58293652	58293653	ABHD6|ENST00000478253.5
chr3	9476407	9476408	SETD5|ENST00000402198.5
chr3	98801644	98801645	DCBLD2|ENST00000326840.10
chr3	9944586	9944587	CRELD1|ENST00000383811.7
chr4	140668928	140668929	TBC1D9|ENST00000442267.2
chr4	1703696	1703697	SLBP|ENST00000489418.5
chr4	175651909	175651910	GPM6A|ENST00000280187.11
chr4	25002787	25002788	LGI2|ENST00000382114.8
chr4	57023479	57023480	POLR2B|ENST00000381227.5
chr4	5821419	5821420	CRMP1|ENST00000324989.11
chr4	84691778	84691779	WDFY3|ENST00000295888.8
chr4	98442243	98442244	RAP1GDS1|ENST00000408927.7
chr5	109335993	109335994	PJA2|ENST00000361189.6
chr5	11098697	11098698	CTNND2|ENST00000304623.12
chr5	11346431	11346432	CTNND2|ENST00000304623.12
chr5	131426678	131426679	CTC-432M15.3|ENST00000514667.1
chr5	131426678	131426679	RAPGEF6|ENST00000509018.5
chr5	132896953	132896954	AFF4|ENST00000265343.9
chr5	137752073	137752074	HNRNPA0|ENST00000314940.6
chr5	141511425	141511426	PCDHGA10|ENST00000398610.2
chr5	141511425	141511426	PCDHGA11|ENST00000398587.6
chr5	141511425	141511426	PCDHGA12|ENST00000252085.3
chr5	141511425	141511426	PCDHGA1|ENST00000517417.2
chr5	141511425	141511426	PCDHGA2|ENST00000394576.2
chr5	141511425	141511426	PCDHGA3|ENST00000253812.7
chr5	141511425	141511426	PCDHGA4|ENST00000571252.2
chr5	141511425	141511426	PCDHGA5|ENST00000518069.1
chr5	141511425	141511426	PCDHGA7|ENST00000518325.1
chr5	141511425	141511426	PCDHGA9|ENST00000573521.1
chr5	141511425	141511426	PCDHGB1|ENST00000523390.1
chr5	141511425	141511426	PCDHGB2|ENST00000522605.1
chr5	141511425	141511426	PCDHGB3|ENST00000576222.1
chr5	141511425	141511426	PCDHGB5|ENST00000617380.1
chr5	141511425	141511426	PCDHGB7|ENST00000398594.3
chr5	141511425	141511426	PCDHGC3|ENST00000308177.4
chr5	141511425	141511426	PCDHGC4|ENST00000306593.1
chr5	141511425	141511426	PCDHGC5|ENST00000252087.2
chr5	142310647	142310648	SPRY4|ENST00000344120.4
chr5	14608981	14608982	FAM105A|ENST00000274217.3
chr5	147400754	147400755	DPYSL3|ENST00000343218.9
chr5	147418564	147418565	DPYSL3|ENST00000343218.9
chr5	147453612	147453613	DPYSL3|ENST00000343218.9
chr5	150094915	150094916	CSF1R|ENST00000286301.7
chr5	17275660	17275661	BASP1|ENST00000322611.3
chr5	175965117	175965118	THOC3|ENST00000513482.1
chr5	177467491	177467492	DBN1|ENST00000292385.9
chr5	179723722	179723723	CANX|ENST00000247461.8
chr5	1815875	1815876	NDUFS6|ENST00000274137.9
chr5	43231730	43231731	NIM1K|ENST00000512796.1
chr5	43231731	43231732	NIM1K|ENST00000512796.1
chr5	43495486	43495487	C5orf34|ENST00000306862.6
chr5	43495676	43495677	C5orf34|ENST00000306862.6
chr5	43496190	43496191	C5orf34|ENST00000306862.6
chr5	480065	480066	SLC9A3|ENST00000264938.7
chr5	72888223	72888224	TNPO1|ENST00000337273.9
chr5	73499165	73499166	BTF3|ENST00000380591.7
chr5	74628648	74628649	ENC1|ENST00000618628.4
chr5	75342587	75342588	HMGCR|ENST00000287936.8
chr5	95517257	95517258	TTC37|ENST00000358746.6
chr6	10730920	10730921	TMEM14C|ENST00000541412.5
chr6	144371006	144371007	UTRN|ENST00000367545.7
chr6	158636652	158636653	DYNLT1|ENST00000367088.1
chr6	166430503	166430504	RPS6KA2|ENST00000510118.5
chr6	30643640	30643641	ATAT1|ENST00000376483.8
chr6	3154096	3154097	TUBB2A|ENST00000333628.3
chr6	3154219	3154220	TUBB2A|ENST00000333628.3
chr6	31639543	31639544	BAG6|ENST00000375964.10
chr6	31640854	31640855	BAG6|ENST00000375964.10
chr6	3224984	3224985	TUBB2B|ENST00000259818.7
chr6	3225107	3225108	TUBB2B|ENST00000259818.7
chr6	3227562	3227563	TUBB2B|ENST00000259818.7
chr6	73517887	73517888	EEF1A1|ENST00000316292.13
chr6	73517913	73517914	EEF1A1|ENST00000316292.13
chr6	73518156	73518157	EEF1A1|ENST00000316292.13
chr6	73518410	73518411	EEF1A1|ENST00000316292.13
chr6	73518556	73518557	EEF1A1|ENST00000316292.13
chr6	73518600	73518601	EEF1A1|ENST00000316292.13
chr6	73519042	73519043	EEF1A1|ENST00000316292.13
chr6	73519368	73519369	EEF1A1|ENST00000316292.13
chr6	73519396	73519397	EEF1A1|ENST00000316292.13
chr6	73519909	73519910	EEF1A1|ENST00000316292.13
chr6	73519938	73519939	EEF1A1|ENST00000316292.13
chr6	85611495	85611496	SYNCRIP|ENST00000616122.4
chr6	89327558	89327559	UBE2J1|ENST00000435041.2
chr7	100489336	100489337	NYAP1|ENST00000300179.6
chr7	100678501	100678502	GNB2|ENST00000303210.8
chr7	102476239	102476240	POLR2J|ENST00000292614.9
chr7	102569893	102569894	POLR2J3|ENST00000511313.5
chr7	102569893	102569894	RP11-514P8.7|ENST00000514917.2
chr7	102668973	102668974	POLR2J2|ENST00000358438.6
chr7	108184580	108184581	NRCAM|ENST00000379028.7
chr7	108510843	108510844	PNPLA8|ENST00000426128.6
chr7	157268787	157268788	UBE3C|ENST00000348165.9
chr7	44834066	44834067	H2AFV|ENST00000222690.10
chr7	55432073	55432074	LANCL2|ENST00000254770.2
chr7	76066547	76066548	MDH2|ENST00000315758.9
chr7	76270327	76270328	SRRM3|ENST00000611745.1
chr7	76327299	76327300	YWHAG|ENST00000307630.4
chr7	99450371	99450372	ATP5J2-PTCD1|ENST00000413834.5
chr7	99450371	99450372	CPSF4|ENST00000436336.6
chr8	102836317	102836318	AZIN1|ENST00000337198.9
chr8	109579821	109579822	SYBU|ENST00000399066.7
chr8	11847803	11847804	CTSB|ENST00000353047.10
chr8	22003249	22003250	XPO7|ENST00000252512.13
chr8	24914381	24914382	NEFM|ENST00000221166.9
chr8	24914570	24914571	NEFM|ENST00000221166.9
chr8	24914667	24914668	NEFM|ENST00000221166.9
chr8	24918474	24918475	NEFM|ENST00000221166.9
chr8	24918603	24918604	NEFM|ENST00000221166.9
chr8	24950994	24950995	NEFL|ENST00000610854.1
chr8	24951202	24951203	NEFL|ENST00000610854.1
chr8	24955822	24955823	NEFL|ENST00000610854.1
chr8	24956241	24956242	NEFL|ENST00000610854.1
chr8	26412617	26412618	BNIP3L|ENST00000380629.6
chr8	69690117	69690118	SLCO5A1|ENST00000260126.8
chr8	69690143	69690144	SLCO5A1|ENST00000260126.8
chr8	69690155	69690156	SLCO5A1|ENST00000260126.8
chr8	69690173	69690174	SLCO5A1|ENST00000260126.8
chr8	69690201	69690202	SLCO5A1|ENST00000260126.8
chr8	69690212	69690213	SLCO5A1|ENST00000260126.8
chr8	69690217	69690218	SLCO5A1|ENST00000260126.8
chr8	69690224	69690225	SLCO5A1|ENST00000260126.8
chr8	69690234	69690235	SLCO5A1|ENST00000260126.8
chr8	69690324	69690325	SLCO5A1|ENST00000260126.8
chr8	69690341	69690342	SLCO5A1|ENST00000260126.8
chr8	72937934	72937935	KCNB2|ENST00000523207.1
chr8	73291175	73291176	RPL7|ENST00000396467.5
chr8	78602125	78602126	PKIA|ENST00000396418.6
chr8	79665124	79665125	STMN2|ENST00000220876.11
chr8	79665971	79665972	STMN2|ENST00000220876.11
chr9	128178472	128178473	CIZ1|ENST00000634901.1
chr9	130136102	130136103	GPR107|ENST00000372406.5
chr9	131485107	131485108	PRRC2B|ENST00000357304.8
chr9	134050494	134050495	BRD3|ENST00000303407.11
chr9	8449757	8449758	PTPRD|ENST00000381196.8
chr9	88478241	88478242	SPIN1|ENST00000375859.3
chr9	93676670	93676671	PHF2|ENST00000359246.8
chrM	12599	12600	MT-ND5|ENST00000361567.2
chrM	13314	13315	MT-ND5|ENST00000361567.2
chrM	4501	4502	MT-ND2|ENST00000361453.3
chrM	5922	5923	MT-CO1|ENST00000361624.2
chrM	5955	5956	MT-CO1|ENST00000361624.2
chrM	5964	5965	MT-CO1|ENST00000361624.2
chrM	6037	6038	MT-CO1|ENST00000361624.2
chrM	6073	6074	MT-CO1|ENST00000361624.2
chrM	6090	6091	MT-CO1|ENST00000361624.2
chrM	6335	6336	MT-CO1|ENST00000361624.2
chrM	6388	6389	MT-CO1|ENST00000361624.2
chrM	6466	6467	MT-CO1|ENST00000361624.2
chrM	6468	6469	MT-CO1|ENST00000361624.2
chrM	6517	6518	MT-CO1|ENST00000361624.2
chrM	6520	6521	MT-CO1|ENST00000361624.2
chrM	6523	6524	MT-CO1|ENST00000361624.2
chrM	6589	6590	MT-CO1|ENST00000361624.2
chrM	6612	6613	MT-CO1|ENST00000361624.2
chrM	6630	6631	MT-CO1|ENST00000361624.2
chrM	6661	6662	MT-CO1|ENST00000361624.2
chrM	6702	6703	MT-CO1|ENST00000361624.2
chrM	6773	6774	MT-CO1|ENST00000361624.2
chrM	6776	6777	MT-CO1|ENST00000361624.2
chrM	6778	6779	MT-CO1|ENST00000361624.2
chrM	6810	6811	MT-CO1|ENST00000361624.2
chrM	6813	6814	MT-CO1|ENST00000361624.2
chrM	6829	6830	MT-CO1|ENST00000361624.2
chrM	6832	6833	MT-CO1|ENST00000361624.2
chrM	6856	6857	MT-CO1|ENST00000361624.2
chrM	6861	6862	MT-CO1|ENST00000361624.2
chrM	6862	6863	MT-CO1|ENST00000361624.2
chrM	6864	6865	MT-CO1|ENST00000361624.2
chrM	6869	6870	MT-CO1|ENST00000361624.2
chrM	6892	6893	MT-CO1|ENST00000361624.2
chrM	6933	6934	MT-CO1|ENST00000361624.2
chrM	6937	6938	MT-CO1|ENST00000361624.2
chrM	6967	6968	MT-CO1|ENST00000361624.2
chrM	6970	6971	MT-CO1|ENST00000361624.2
chrM	6978	6979	MT-CO1|ENST00000361624.2
chrM	7037	7038	MT-CO1|ENST00000361624.2
chrM	7050	7051	MT-CO1|ENST00000361624.2
chrM	7056	7057	MT-CO1|ENST00000361624.2
chrM	7121	7122	MT-CO1|ENST00000361624.2
chrM	7260	7261	MT-CO1|ENST00000361624.2
chrM	7296	7297	MT-CO1|ENST00000361624.2
chrM	7297	7298	MT-CO1|ENST00000361624.2
chrM	7300	7301	MT-CO1|ENST00000361624.2
chrM	7382	7383	MT-CO1|ENST00000361624.2
chrM	7425	7426	MT-CO1|ENST00000361624.2
chrM	7429	7430	MT-CO1|ENST00000361624.2
chrM	7431	7432	MT-CO1|ENST00000361624.2
chrM	7435	7436	MT-CO1|ENST00000361624.2
chrM	7693	7694	MT-CO2|ENST00000361739.1
chrM	7779	7780	MT-CO2|ENST00000361739.1
chrM	9011	9012	MT-ATP6|ENST00000361899.2
chrM	9645	9646	MT-CO3|ENST00000362079.2
chrM	9853	9854	MT-CO3|ENST00000362079.2
chrM	9873	9874	MT-CO3|ENST00000362079.2
chrM	9977	9978	MT-CO3|ENST00000362079.2
chrX	111294870	111294871	DCX|ENST00000358070.9
chrX	119538858	119538859	CXorf56|ENST00000320339.8
chrX	13771714	13771715	GPM6B|ENST00000454189.6
chrX	18633865	18633866	CDKL5|ENST00000623535.1
chrX	56993006	56993007	SPIN3|ENST00000374919.4
chrX	91877021	91877022	PCDH11X|ENST00000373094.5
chrY	5098455	5098456	PCDH11Y|ENST00000400457.3

## Sheet: CT2
chr1	108700117	108700118	PRPF38B|ENST00000370021.1
chr1	109251943	109251944	CELSR2|ENST00000271332.3
chr1	145856779	145856780	PIAS3|ENST00000393045.6
chr1	156320839	156320840	CCT3|ENST00000295688.7
chr1	156668932	156668933	NES|ENST00000368223.3
chr1	156699674	156699675	CRABP2|ENST00000621784.4
chr1	158093341	158093342	KIRREL|ENST00000368173.7
chr1	160309148	160309149	COPA|ENST00000241704.7
chr1	180889380	180889381	XPR1|ENST00000367590.8
chr1	183122131	183122132	LAMC1|ENST00000258341.4
chr1	186371040	186371041	TPR|ENST00000367478.8
chr1	202755327	202755328	KDM5B|ENST00000367265.7
chr1	205016339	205016340	NFASC|ENST00000339876.10
chr1	205076631	205076632	CNTN2|ENST00000331830.5
chr1	20742999	20743000	HP1BP3|ENST00000375003.6
chr1	212385393	212385394	TMEM206|ENST00000261455.8
chr1	212898857	212898858	FLVCR1|ENST00000366971.8
chr1	228097415	228097416	ARF1|ENST00000541182.1
chr1	23079668	23079669	KDM1A|ENST00000400181.8
chr1	235552067	235552068	GNG4|ENST00000391854.6
chr1	237603074	237603075	RYR2|ENST00000366574.6
chr1	237603110	237603111	RYR2|ENST00000366574.6
chr1	237603135	237603136	RYR2|ENST00000366574.6
chr1	237603275	237603276	RYR2|ENST00000366574.6
chr1	237603294	237603295	RYR2|ENST00000366574.6
chr1	243125389	243125390	CEP170|ENST00000366542.5
chr1	31180637	31180638	NKAIN1|ENST00000373736.6
chr1	32195488	32195489	TXLNA|ENST00000373609.1
chr1	32334446	32334447	MARCKSL1|ENST00000329421.7
chr1	42696908	42696909	YBX1|ENST00000436427.1
chr1	51910211	51910212	RAB3B|ENST00000371655.3
chr1	54225682	54225683	SSBP3|ENST00000610401.4
chr1	81505604	81505605	ADGRL2|ENST00000370728.5
chr1	91387230	91387231	HFM1|ENST00000370425.7
chr1	91387254	91387255	HFM1|ENST00000370425.7
chr1	91387259	91387260	HFM1|ENST00000370425.7
chr1	91387297	91387298	HFM1|ENST00000370425.7
chr1	91387361	91387362	HFM1|ENST00000370425.7
chr1	91387383	91387384	HFM1|ENST00000370425.7
chr1	91387447	91387448	HFM1|ENST00000370425.7
chr1	91387525	91387526	HFM1|ENST00000370425.7
chr1	91387557	91387558	HFM1|ENST00000370425.7
chr1	9755149	9755150	CLSTN1|ENST00000377298.8
chr10	100363501	100363502	SCD|ENST00000370355.2
chr10	110937129	110937130	SHOC2|ENST00000369452.8
chr10	129840396	129840397	EBF3|ENST00000368648.7
chr10	13634296	13634297	RP11-295P9.13|ENST00000601460.5
chr10	15211917	15211918	FAM171A1|ENST00000378116.8
chr10	48435917	48435918	MAPK8|ENST00000395611.7
chr10	48746028	48746029	WDFY4|ENST00000325239.10
chr10	69369266	69369267	HK1|ENST00000360289.6
chr10	72066971	72066972	SPOCK2|ENST00000373109.6
chr10	72918507	72918508	OIT3|ENST00000334011.9
chr10	80520814	80520815	TSPAN14|ENST00000429989.7
chr10	95314484	95314485	SORBS1|ENST00000371247.6
chr10	97432609	97432610	PGAM1|ENST00000334828.5
chr11	10508118	10508119	MTRNR2L8|ENST00000536684.2
chr11	10509051	10509052	MTRNR2L8|ENST00000536684.2
chr11	10509052	10509053	MTRNR2L8|ENST00000536684.2
chr11	10509059	10509060	MTRNR2L8|ENST00000536684.2
chr11	2883408	2883409	CDKN1C|ENST00000414822.7
chr11	45242661	45242662	SYT13|ENST00000020926.7
chr11	46657124	46657125	ATG13|ENST00000359513.8
chr11	61344235	61344236	TKFC|ENST00000394900.7
chr11	61967385	61967386	FTH1|ENST00000273550.11
chr11	63750115	63750116	RTN3|ENST00000377819.9
chr11	65856212	65856213	CFL1|ENST00000525451.6
chr11	66266484	66266485	KLC2|ENST00000394065.2
chr11	7995271	7995272	EIF3F|ENST00000533626.5
chr11	92354953	92354954	FAT3|ENST00000409404.6
chr12	120438443	120438444	AL021546.6|ENST00000551806.1
chr12	120440474	120440475	AL021546.6|ENST00000551806.1
chr12	20551471	20551472	PDE3A|ENST00000359062.3
chr12	20551473	20551474	PDE3A|ENST00000359062.3
chr12	20551528	20551529	PDE3A|ENST00000359062.3
chr12	20551536	20551537	PDE3A|ENST00000359062.3
chr12	4304741	4304742	CCND2|ENST00000261254.7
chr12	49184896	49184897	TUBA1A|ENST00000301071.11
chr12	49184928	49184929	TUBA1A|ENST00000301071.11
chr12	49184929	49184930	TUBA1A|ENST00000301071.11
chr12	49184931	49184932	TUBA1A|ENST00000301071.11
chr12	49185113	49185114	TUBA1A|ENST00000301071.11
chr12	49185228	49185229	TUBA1A|ENST00000301071.11
chr12	49185350	49185351	TUBA1A|ENST00000301071.11
chr12	49185360	49185361	TUBA1A|ENST00000301071.11
chr12	49185690	49185691	TUBA1A|ENST00000301071.11
chr12	49185692	49185693	TUBA1A|ENST00000301071.11
chr12	49185695	49185696	TUBA1A|ENST00000301071.11
chr12	49185720	49185721	TUBA1A|ENST00000301071.11
chr12	49185789	49185790	TUBA1A|ENST00000301071.11
chr12	49185834	49185835	TUBA1A|ENST00000301071.11
chr12	49186323	49186324	TUBA1A|ENST00000301071.11
chr12	49186428	49186429	TUBA1A|ENST00000301071.11
chr12	49269961	49269962	TUBA1C|ENST00000301072.10
chr12	49272452	49272453	TUBA1C|ENST00000301072.10
chr12	49272521	49272522	TUBA1C|ENST00000301072.10
chr12	49273013	49273014	TUBA1C|ENST00000301072.10
chr12	50099513	50099514	SMARCD1|ENST00000394963.8
chr12	55993814	55993815	RAB5B|ENST00000360299.9
chr12	56116763	56116764	RPL41|ENST00000546591.5
chr12	56272399	56272400	CS|ENST00000548567.5
chr12	56276020	56276021	CS|ENST00000548567.5
chr12	56328061	56328062	PAN2|ENST00000425394.6
chr12	56639150	56639151	ATP5B|ENST00000262030.7
chr12	56644791	56644792	ATP5B|ENST00000262030.7
chr12	57820738	57820739	CTDSP2|ENST00000398073.6
chr12	6536991	6536992	GAPDH|ENST00000229239.9
chr12	6538325	6538326	GAPDH|ENST00000229239.9
chr12	6583028	6583029	CHD4|ENST00000544484.5
chr12	6770639	6770640	PTMS|ENST00000619580.4
chr12	6856737	6856738	USP5|ENST00000229268.12
chr12	6941768	6941769	ATN1|ENST00000356654.8
chr12	71755275	71755276	RAB21|ENST00000261263.4
chr12	8932952	8932953	PHC1|ENST00000433083.6
chr12	93575071	93575072	SOCS2|ENST00000548537.1
chr12	9695409	9695410	CLEC2D|ENST00000290855.10
chr13	113094529	113094530	MCF2L|ENST00000397030.5
chr13	28214805	28214806	PAN3|ENST00000399613.1
chr13	35810888	35810889	DCLK1|ENST00000360631.7
chr13	39343480	39343481	LHFP|ENST00000379589.3
chr13	45341089	45341090	TPT1|ENST00000616577.4
chr14	100334798	100334799	WARS|ENST00000355338.6
chr14	102940120	102940121	CDC42BPB|ENST00000361246.6
chr14	21521181	21521182	SALL2|ENST00000614342.1
chr14	23033580	23033581	PSMB5|ENST00000361611.10
chr14	55065535	55065536	MAPK1IP1L|ENST00000395468.8
chr14	69118657	69118658	DCAF5|ENST00000341516.9
chr14	81180039	81180040	GTF2A1|ENST00000553612.5
chr14	93223953	93223954	UBR7|ENST00000013070.10
chr14	94062384	94062385	DDX24|ENST00000621632.4
chr15	32641746	32641747	SCG5|ENST00000300175.8
chr15	38353522	38353523	SPRED1|ENST00000299084.8
chr15	42944716	42944717	UBR1|ENST00000290650.8
chr15	51720778	51720779	SCG3|ENST00000220478.7
chr15	74304255	74304256	CCDC33|ENST00000398814.7
chr15	74597909	74597910	ARID3B|ENST00000346246.9
chr15	75505705	75505706	PTPN9|ENST00000618819.4
chr15	77111268	77111269	PEAK1|ENST00000560626.6
chr15	77181835	77181836	PEAK1|ENST00000560626.6
chr15	90271973	90271974	NGRN|ENST00000379095.4
chr15	90271973	90271974	RP11-697E2.12|ENST00000622269.1
chr15	99713009	99713010	MEF2A|ENST00000354410.9
chr16	14247477	14247478	MKL2|ENST00000571589.5
chr16	14875349	14875350	NOMO1|ENST00000287667.11
chr16	14880098	14880099	NOMO1|ENST00000287667.11
chr16	16274002	16274003	NOMO3|ENST00000399336.8
chr16	16278745	16278746	NOMO3|ENST00000399336.8
chr16	18433390	18433391	NOMO2|ENST00000330537.10
chr16	18515925	18515926	NOMO2|ENST00000330537.10
chr16	18520668	18520669	NOMO2|ENST00000330537.10
chr16	19699593	19699594	C16orf62|ENST00000251143.9
chr16	2056716	2056717	TSC2|ENST00000219476.7
chr16	29810527	29810528	MAZ|ENST00000219782.10
chr16	29814812	29814813	PRRT2|ENST00000300797.7
chr16	30029460	30029461	FAM57B|ENST00000380495.8
chr16	30766428	30766429	RNF40|ENST00000324685.10
chr16	54934364	54934365	IRX5|ENST00000394636.8
chr16	56451112	56451113	NUDT21|ENST00000300291.9
chr16	70329947	70329948	DDX19B|ENST00000288071.10
chr16	70329947	70329948	RP11-529K1.3|ENST00000443119.7
chr16	77971924	77971925	VAT1L|ENST00000302536.2
chr16	77977919	77977920	VAT1L|ENST00000302536.2
chr16	8917064	8917065	USP7|ENST00000344836.8
chr16	89883413	89883414	TCF25|ENST00000263347.11
chr16	89934926	89934927	RP11-566K11.2|ENST00000556922.1
chr16	89934926	89934927	TUBB3|ENST00000554444.5
chr17	19906061	19906062	AKAP10|ENST00000225737.10
chr17	21243404	21243405	NATD1|ENST00000611551.1
chr17	22524468	22524469	MTRNR2L1|ENST00000540040.2
chr17	30185926	30185927	NSRP1|ENST00000247026.9
chr17	32487734	32487735	CDK5R1|ENST00000313401.3
chr17	35657610	35657611	AP2B1|ENST00000621914.4
chr17	35723789	35723790	AP2B1|ENST00000621914.4
chr17	4164112	4164113	ANKFY1|ENST00000341657.8
chr17	42315716	42315717	STAT3|ENST00000264657.9
chr17	44082658	44082659	HDAC5|ENST00000225983.10
chr17	44852528	44852529	EFTUD2|ENST00000426333.6
chr17	45996631	45996632	MAPT|ENST00000344290.9
chr17	46330736	46330737	LRRC37A|ENST00000320254.5
chr17	46548598	46548599	AC138645.1|ENST00000622488.5
chr17	46548598	46548599	AC138645.2|ENST00000329240.9
chr17	46548598	46548599	LRRC37A2|ENST00000576629.5
chr17	49512792	49512793	NGFR|ENST00000172229.7
chr17	49513251	49513252	NGFR|ENST00000172229.7
chr17	51160009	51160010	NME1-NME2|ENST00000555572.1
chr17	51160009	51160010	NME1|ENST00000511355.5
chr17	63592729	63592730	DCAF7|ENST00000614556.4
chr17	64860685	64860686	LRRC37A3|ENST00000584306.5
chr17	7459415	7459416	ZBTB4|ENST00000311403.4
chr17	7577685	7577686	EIF4A1|ENST00000293831.12
chr17	76398900	76398901	UBE2O|ENST00000319380.11
chr17	76683903	76683904	MXRA7|ENST00000355797.7
chr17	78976061	78976062	LGALS3BP|ENST00000262776.7
chr17	81510124	81510125	ACTG1|ENST00000575842.5
chr17	81511039	81511040	ACTG1|ENST00000575842.5
chr17	81512073	81512074	ACTG1|ENST00000575842.5
chr17	8379822	8379823	RPL26|ENST00000578812.5
chr18	35247312	35247313	ZNF397|ENST00000330501.11
chr18	68690433	68690434	TMX3|ENST00000299608.6
chr18	80137114	80137115	ADNP2|ENST00000262198.8
chr19	10987918	10987919	SMARCA4|ENST00000429416.7
chr19	11025435	11025436	SMARCA4|ENST00000429416.7
chr19	17618439	17618440	UNC13A|ENST00000519716.6
chr19	1776256	1776257	ONECUT3|ENST00000382349.4
chr19	17861456	17861457	RPL18A|ENST00000600147.5
chr19	18435875	18435876	ISYNA1|ENST00000338128.12
chr19	18617098	18617099	TMEM59L|ENST00000600490.5
chr19	18620523	18620524	TMEM59L|ENST00000600490.5
chr19	32384580	32384581	ZNF507|ENST00000311921.8
chr19	36015949	36015950	CLIP3|ENST00000360535.8
chr19	3979351	3979352	EEF2|ENST00000309311.6
chr19	40757340	40757341	SNRPA|ENST00000243563.7
chr19	41564234	41564235	CEACAM21|ENST00000407170.6
chr19	42300268	42300269	PAFAH1B3|ENST00000538771.5
chr19	45641666	45641667	EML2|ENST00000536630.5
chr19	48383024	48383025	KDELR1|ENST00000597017.5
chr19	54106889	54106890	NDUFA3|ENST00000485876.5
chr19	55669159	55669160	U2AF2|ENST00000450554.6
chr19	5918600	5918601	RANBP3|ENST00000340578.10
chr2	113951786	113951787	ACTR3|ENST00000263238.6
chr2	15620312	15620313	DDX1|ENST00000381341.6
chr2	1632261	1632262	PXDN|ENST00000252804.8
chr2	1643372	1643373	PXDN|ENST00000252804.8
chr2	201632086	201632087	TMEM237|ENST00000409444.6
chr2	206146964	206146965	NDUFS1|ENST00000233190.10
chr2	207078740	207078741	KLF7|ENST00000309446.10
chr2	211779381	211779382	ERBB4|ENST00000342788.8
chr2	231072335	231072336	PSMD1|ENST00000308696.10
chr2	241353213	241353214	SEPT2|ENST00000391973.6
chr2	25247645	25247646	DNMT3A|ENST00000264709.7
chr2	26948050	26948051	DPYSL5|ENST00000288699.10
chr2	26949675	26949676	DPYSL5|ENST00000288699.10
chr2	26950328	26950329	DPYSL5|ENST00000288699.10
chr2	27435171	27435172	NRBP1|ENST00000233557.7
chr2	3617635	3617636	COLEC11|ENST00000382062.6
chr2	54629359	54629360	SPTBN1|ENST00000615901.4
chr2	61872110	61872111	CCT4|ENST00000394440.7
chr2	69325068	69325069	GFPT1|ENST00000357308.8
chr2	70248464	70248465	TIA1|ENST00000433529.6
chr2	74529146	74529147	AUP1|ENST00000377526.3
chr2	84906617	84906618	TMSB10|ENST00000233143.5
chr2	99593501	99593502	AFF3|ENST00000409236.6
chr20	25292435	25292436	PYGB|ENST00000216962.8
chr20	31538239	31538240	HM13|ENST00000498035.5
chr20	32000757	32000758	XKR7|ENST00000562532.2
chr20	327829	327830	SOX12|ENST00000342665.4
chr20	32836735	32836736	MAPRE1|ENST00000375571.5
chr20	44752753	44752754	RIMS4|ENST00000372851.7
chr20	50840702	50840703	BCAS4|ENST00000371608.6
chr20	5190983	5190984	CDS2|ENST00000460006.5
chr20	61928292	61928293	CDH4|ENST00000614565.4
chr20	63639807	63639808	STMN3|ENST00000540534.5
chr20	9538129	9538130	PAK5|ENST00000378429.3
chr21	33552709	33552710	SON|ENST00000356577.8
chr22	19357005	19357006	HIRA|ENST00000263208.5
chr22	23261030	23261031	BCR|ENST00000305877.12
chr22	37632839	37632840	GGA1|ENST00000406772.5
chr22	37877857	37877858	EIF3L|ENST00000412331.6
chr22	41358075	41358076	ZC3H7B|ENST00000352645.4
chr22	41675022	41675023	SNU13|ENST00000401959.5
chr22	41996143	41996144	SEPT3|ENST00000396425.7
chr22	42090614	42090615	NDUFA6|ENST00000498737.6
chr22	42585868	42585869	POLDIP3|ENST00000451060.6
chr22	46701688	46701689	CERK|ENST00000216264.12
chr3	105658967	105658968	CBLB|ENST00000264122.8
chr3	108222133	108222134	IFT57|ENST00000264538.3
chr3	115720850	115720851	GAP43|ENST00000393780.3
chr3	127027959	127027960	PLXNA1|ENST00000393409.2
chr3	127029952	127029953	PLXNA1|ENST00000393409.2
chr3	128620420	128620421	RPN1|ENST00000296255.7
chr3	135248480	135248481	EPHB1|ENST00000398015.7
chr3	184166910	184166911	DVL3|ENST00000313143.7
chr3	184315501	184315502	EIF4G1|ENST00000342981.8
chr3	184315769	184315770	EIF4G1|ENST00000342981.8
chr3	185657365	185657366	IGF2BP2|ENST00000382199.6
chr3	197954008	197954009	RPL35A|ENST00000464167.5
chr3	23919376	23919377	RPL15|ENST00000456530.6
chr3	41233345	41233346	CTNNB1|ENST00000349496.9
chr3	48660331	48660332	CELSR3|ENST00000164024.4
chr3	49012120	49012121	WDR6|ENST00000395474.7
chr3	49358141	49358142	GPX1|ENST00000419783.1
chr3	49532426	49532427	DAG1|ENST00000545947.5
chr3	49675707	49675708	APEH|ENST00000296456.9
chr3	54899862	54899863	CACNA2D3|ENST00000474759.5
chr3	58293652	58293653	ABHD6|ENST00000478253.5
chr3	96618088	96618089	MTRNR2L12|ENST00000600213.3
chr3	96618092	96618093	MTRNR2L12|ENST00000600213.3
chr3	96618098	96618099	MTRNR2L12|ENST00000600213.3
chr3	96618099	96618100	MTRNR2L12|ENST00000600213.3
chr3	96618106	96618107	MTRNR2L12|ENST00000600213.3
chr3	98801644	98801645	DCBLD2|ENST00000326840.10
chr3	9944586	9944587	CRELD1|ENST00000383811.7
chr4	1703696	1703697	SLBP|ENST00000489418.5
chr4	184628852	184628853	CASP3|ENST00000308394.8
chr4	22445027	22445028	ADGRA3|ENST00000334304.9
chr4	25002787	25002788	LGI2|ENST00000382114.8
chr4	31142837	31142838	PCDH7|ENST00000511884.6
chr4	48420145	48420146	SLAIN2|ENST00000264313.10
chr4	57023479	57023480	POLR2B|ENST00000381227.5
chr4	5821419	5821420	CRMP1|ENST00000324989.11
chr4	5828523	5828524	CRMP1|ENST00000324989.11
chr4	61732838	61732839	ADGRL3|ENST00000512091.6
chr4	7058979	7058980	GRPEL1|ENST00000264954.4
chr4	75774681	75774682	USO1|ENST00000264904.8
chr4	77713424	77713425	CNOT6L|ENST00000504123.5
chr4	84691778	84691779	WDFY3|ENST00000295888.8
chr4	90838808	90838809	CCSER1|ENST00000509176.5
chr4	98442243	98442244	RAP1GDS1|ENST00000408927.7
chr5	10258156	10258157	CCT5|ENST00000280326.8
chr5	109335993	109335994	PJA2|ENST00000361189.6
chr5	11346431	11346432	CTNND2|ENST00000304623.12
chr5	118973802	118973803	DTWD2|ENST00000304058.8
chr5	132896953	132896954	AFF4|ENST00000265343.9
chr5	134925480	134925481	PCBD2|ENST00000512783.5
chr5	137752482	137752483	HNRNPA0|ENST00000314940.6
chr5	142310647	142310648	SPRY4|ENST00000344120.4
chr5	147418564	147418565	DPYSL3|ENST00000343218.9
chr5	147453612	147453613	DPYSL3|ENST00000343218.9
chr5	171387974	171387975	NPM1|ENST00000296930.9
chr5	17275660	17275661	BASP1|ENST00000322611.3
chr5	179723722	179723723	CANX|ENST00000247461.8
chr5	40832534	40832535	RPL37|ENST00000274242.9
chr5	43231730	43231731	NIM1K|ENST00000512796.1
chr5	43231731	43231732	NIM1K|ENST00000512796.1
chr5	43231733	43231734	NIM1K|ENST00000512796.1
chr5	43496190	43496191	C5orf34|ENST00000306862.6
chr5	480065	480066	SLC9A3|ENST00000264938.7
chr5	72208823	72208824	MAP1B|ENST00000296755.11
chr5	72888223	72888224	TNPO1|ENST00000337273.9
chr5	73499165	73499166	BTF3|ENST00000380591.7
chr5	74628648	74628649	ENC1|ENST00000618628.4
chr5	80650900	80650901	DHFR|ENST00000439211.6
chr5	80650904	80650905	DHFR|ENST00000439211.6
chr5	80650910	80650911	DHFR|ENST00000439211.6
chr5	80650911	80650912	DHFR|ENST00000439211.6
chr5	80650918	80650919	DHFR|ENST00000439211.6
chr5	93683690	93683691	FAM172A|ENST00000395965.7
chr6	122444759	122444760	SERINC1|ENST00000339697.4
chr6	133272960	133272961	EYA4|ENST00000367895.9
chr6	144371006	144371007	UTRN|ENST00000367545.7
chr6	158636652	158636653	DYNLT1|ENST00000367088.1
chr6	30643640	30643641	ATAT1|ENST00000376483.8
chr6	30723653	30723654	TUBB|ENST00000396389.5
chr6	3154219	3154220	TUBB2A|ENST00000333628.3
chr6	31639543	31639544	BAG6|ENST00000375964.10
chr6	3224619	3224620	TUBB2B|ENST00000259818.7
chr6	3225107	3225108	TUBB2B|ENST00000259818.7
chr6	3227562	3227563	TUBB2B|ENST00000259818.7
chr6	53269236	53269237	ELOVL5|ENST00000370918.8
chr6	73518042	73518043	EEF1A1|ENST00000316292.13
chr6	73518556	73518557	EEF1A1|ENST00000316292.13
chr6	73519368	73519369	EEF1A1|ENST00000316292.13
chr6	73519396	73519397	EEF1A1|ENST00000316292.13
chr6	73519909	73519910	EEF1A1|ENST00000316292.13
chr6	73520036	73520037	EEF1A1|ENST00000316292.13
chr6	73520037	73520038	EEF1A1|ENST00000316292.13
chr6	8013926	8013927	BLOC1S5|ENST00000397457.6
chr6	85611495	85611496	SYNCRIP|ENST00000616122.4
chr6	89327558	89327559	UBE2J1|ENST00000435041.2
chr7	100091921	100091922	COPS6|ENST00000303904.7
chr7	100175828	100175829	GPC2|ENST00000292377.3
chr7	100489336	100489337	NYAP1|ENST00000300179.6
chr7	100678501	100678502	GNB2|ENST00000303210.8
chr7	128769801	128769802	CALU|ENST00000542996.6
chr7	129832940	129832941	UBE2H|ENST00000355621.7
chr7	132159575	132159576	PLXNA4|ENST00000359827.7
chr7	132164267	132164268	PLXNA4|ENST00000359827.7
chr7	133035016	133035017	CHCHD3|ENST00000262570.9
chr7	149070620	149070621	ZNF786|ENST00000316286.13
chr7	23347674	23347675	IGF2BP3|ENST00000258729.7
chr7	38384047	38384048	AMPH|ENST00000356264.6
chr7	55432073	55432074	LANCL2|ENST00000254770.2
chr7	73536862	73536863	BCL7B|ENST00000223368.6
chr7	74965041	74965042	GATSL2|ENST00000616305.1
chr7	76066802	76066803	MDH2|ENST00000315758.9
chr7	76327299	76327300	YWHAG|ENST00000307630.4
chr7	76328357	76328358	YWHAG|ENST00000307630.4
chr7	99450371	99450372	ATP5J2-PTCD1|ENST00000413834.5
chr7	99450371	99450372	CPSF4|ENST00000436336.6
chr8	102836317	102836318	AZIN1|ENST00000337198.9
chr8	109579821	109579822	SYBU|ENST00000399066.7
chr8	11847803	11847804	CTSB|ENST00000353047.10
chr8	124543235	124543236	NDUFB9|ENST00000522532.5
chr8	143992769	143992770	GRINA|ENST00000313269.5
chr8	22003249	22003250	XPO7|ENST00000252512.13
chr8	24914381	24914382	NEFM|ENST00000221166.9
chr8	24914544	24914545	NEFM|ENST00000221166.9
chr8	24914570	24914571	NEFM|ENST00000221166.9
chr8	24914577	24914578	NEFM|ENST00000221166.9
chr8	24914667	24914668	NEFM|ENST00000221166.9
chr8	24914860	24914861	NEFM|ENST00000221166.9
chr8	24917115	24917116	NEFM|ENST00000221166.9
chr8	24917851	24917852	NEFM|ENST00000221166.9
chr8	24917863	24917864	NEFM|ENST00000221166.9
chr8	24918603	24918604	NEFM|ENST00000221166.9
chr8	24918609	24918610	NEFM|ENST00000221166.9
chr8	24918895	24918896	NEFM|ENST00000221166.9
chr8	24918937	24918938	NEFM|ENST00000221166.9
chr8	24919012	24919013	NEFM|ENST00000221166.9
chr8	24951202	24951203	NEFL|ENST00000610854.1
chr8	24951343	24951344	NEFL|ENST00000610854.1
chr8	24952697	24952698	NEFL|ENST00000610854.1
chr8	24952709	24952710	NEFL|ENST00000610854.1
chr8	24955822	24955823	NEFL|ENST00000610854.1
chr8	24956049	24956050	NEFL|ENST00000610854.1
chr8	24956050	24956051	NEFL|ENST00000610854.1
chr8	24956241	24956242	NEFL|ENST00000610854.1
chr8	69690117	69690118	SLCO5A1|ENST00000260126.8
chr8	69690127	69690128	SLCO5A1|ENST00000260126.8
chr8	69690143	69690144	SLCO5A1|ENST00000260126.8
chr8	69690155	69690156	SLCO5A1|ENST00000260126.8
chr8	69690173	69690174	SLCO5A1|ENST00000260126.8
chr8	69690201	69690202	SLCO5A1|ENST00000260126.8
chr8	69690212	69690213	SLCO5A1|ENST00000260126.8
chr8	69690217	69690218	SLCO5A1|ENST00000260126.8
chr8	69690224	69690225	SLCO5A1|ENST00000260126.8
chr8	69690234	69690235	SLCO5A1|ENST00000260126.8
chr8	69690250	69690251	SLCO5A1|ENST00000260126.8
chr8	69690324	69690325	SLCO5A1|ENST00000260126.8
chr8	69690341	69690342	SLCO5A1|ENST00000260126.8
chr8	70273405	70273406	NCOA2|ENST00000452400.6
chr8	72937934	72937935	KCNB2|ENST00000523207.1
chr8	74365091	74365092	GDAP1|ENST00000220822.11
chr8	79665124	79665125	STMN2|ENST00000220876.11
chr8	80037036	80037037	TPD52|ENST00000448733.3
chr8	99233467	99233468	VPS13B|ENST00000358544.6
chr9	124521975	124521976	NR6A1|ENST00000487099.6
chr9	128342459	128342460	SLC27A4|ENST00000300456.4
chr9	128342626	128342627	SLC27A4|ENST00000300456.4
chr9	131485107	131485108	PRRC2B|ENST00000357304.8
chr9	131487200	131487201	PRRC2B|ENST00000357304.8
chr9	134050494	134050495	BRD3|ENST00000303407.11
chr9	33026867	33026868	DNAJA1|ENST00000330899.4
chr9	34398799	34398800	FAM219A|ENST00000445726.5
chr9	34557624	34557625	CNTFR|ENST00000378980.7
chr9	35752761	35752762	RGP1|ENST00000378078.4
chr9	36338608	36338609	RNF38|ENST00000357058.7
chr9	37438386	37438387	ZBTB5|ENST00000307750.4
chr9	8449757	8449758	PTPRD|ENST00000381196.8
chr9	88478241	88478242	SPIN1|ENST00000375859.3
chr9	93676670	93676671	PHF2|ENST00000359246.8
chrM	11669	11670	MT-ND4|ENST00000361381.2
chrM	12599	12600	MT-ND5|ENST00000361567.2
chrM	13314	13315	MT-ND5|ENST00000361567.2
chrM	4501	4502	MT-ND2|ENST00000361453.3
chrM	5922	5923	MT-CO1|ENST00000361624.2
chrM	5985	5986	MT-CO1|ENST00000361624.2
chrM	6037	6038	MT-CO1|ENST00000361624.2
chrM	6191	6192	MT-CO1|ENST00000361624.2
chrM	6230	6231	MT-CO1|ENST00000361624.2
chrM	6271	6272	MT-CO1|ENST00000361624.2
chrM	6388	6389	MT-CO1|ENST00000361624.2
chrM	6466	6467	MT-CO1|ENST00000361624.2
chrM	6468	6469	MT-CO1|ENST00000361624.2
chrM	6523	6524	MT-CO1|ENST00000361624.2
chrM	6589	6590	MT-CO1|ENST00000361624.2
chrM	6661	6662	MT-CO1|ENST00000361624.2
chrM	6778	6779	MT-CO1|ENST00000361624.2
chrM	6810	6811	MT-CO1|ENST00000361624.2
chrM	6829	6830	MT-CO1|ENST00000361624.2
chrM	6832	6833	MT-CO1|ENST00000361624.2
chrM	6856	6857	MT-CO1|ENST00000361624.2
chrM	6861	6862	MT-CO1|ENST00000361624.2
chrM	6896	6897	MT-CO1|ENST00000361624.2
chrM	6967	6968	MT-CO1|ENST00000361624.2
chrM	6970	6971	MT-CO1|ENST00000361624.2
chrM	7037	7038	MT-CO1|ENST00000361624.2
chrM	7056	7057	MT-CO1|ENST00000361624.2
chrM	7121	7122	MT-CO1|ENST00000361624.2
chrM	7260	7261	MT-CO1|ENST00000361624.2
chrM	7297	7298	MT-CO1|ENST00000361624.2
chrM	7340	7341	MT-CO1|ENST00000361624.2
chrM	7345	7346	MT-CO1|ENST00000361624.2
chrM	7382	7383	MT-CO1|ENST00000361624.2
chrM	7389	7390	MT-CO1|ENST00000361624.2
chrM	7435	7436	MT-CO1|ENST00000361624.2
chrM	7875	7876	MT-CO2|ENST00000361739.1
chrM	8094	8095	MT-CO2|ENST00000361739.1
chrM	8256	8257	MT-CO2|ENST00000361739.1
chrM	9011	9012	MT-ATP6|ENST00000361899.2
chrM	9645	9646	MT-CO3|ENST00000362079.2
chrM	9977	9978	MT-CO3|ENST00000362079.2
chrX	111294870	111294871	DCX|ENST00000358070.9
chrX	12976307	12976308	TMSB4X|ENST00000380636.1
chrX	12976904	12976905	TMSB4X|ENST00000380636.1
chrX	12977021	12977022	TMSB4X|ENST00000380636.1
chrX	12977089	12977090	TMSB4X|ENST00000380636.1
chrX	13817200	13817201	GPM6B|ENST00000454189.6
chrX	41518052	41518053	CASK|ENST00000421587.6
chrX	47144702	47144703	NDUFB11|ENST00000377811.3
chrX	76429580	76429581	MAGEE1|ENST00000361470.3
chrX	81297483	81297484	SH3BGRL|ENST00000373212.5
chrX	91877021	91877022	PCDH11X|ENST00000373094.5
chrX	92113575	92113576	PCDH11X|ENST00000373094.5
chrY	13704381	13704382	TMSB4Y|ENST00000284856.3
chrY	5098455	5098456	PCDH11Y|ENST00000400457.3

## Sheet: CT2-smDEL
chr1	10654429	10654430	CASZ1|ENST00000377022.7
chr1	108700117	108700118	PRPF38B|ENST00000370021.1
chr1	109223999	109224000	SARS|ENST00000369923.4
chr1	109251943	109251944	CELSR2|ENST00000271332.3
chr1	109311134	109311135	SORT1|ENST00000256637.7
chr1	110603667	110603668	KCNA2|ENST00000633222.1
chr1	145856779	145856780	PIAS3|ENST00000393045.6
chr1	149904953	149904954	SV2A|ENST00000369146.7
chr1	150999398	150999399	FAM63A|ENST00000361936.9
chr1	151262202	151262203	PSMD4|ENST00000368884.7
chr1	154344668	154344669	ATP8B2|ENST00000368489.3
chr1	154601474	154601475	ADAR|ENST00000368474.8
chr1	156320839	156320840	CCT3|ENST00000295688.7
chr1	156668932	156668933	NES|ENST00000368223.3
chr1	156675267	156675268	NES|ENST00000368223.3
chr1	156699674	156699675	CRABP2|ENST00000621784.4
chr1	158093341	158093342	KIRREL|ENST00000368173.7
chr1	15939982	15939983	SPEN|ENST00000375759.7
chr1	160309148	160309149	COPA|ENST00000241704.7
chr1	168080512	168080513	GPR161|ENST00000537209.5
chr1	178458058	178458059	RASAL2|ENST00000462775.5
chr1	179185383	179185384	ABL2|ENST00000502732.5
chr1	1793244	1793245	GNB1|ENST00000610897.4
chr1	180889380	180889381	XPR1|ENST00000367590.8
chr1	181716117	181716118	CACNA1E|ENST00000621791.4
chr1	183122131	183122132	LAMC1|ENST00000258341.4
chr1	186371040	186371041	TPR|ENST00000367478.8
chr1	19173075	19173076	UBR4|ENST00000375254.7
chr1	201005419	201005420	KIF21B|ENST00000332129.6
chr1	202755327	202755328	KDM5B|ENST00000367265.7
chr1	204411498	204411499	PPP1R15B|ENST00000367188.4
chr1	204997274	204997275	NFASC|ENST00000339876.10
chr1	205016339	205016340	NFASC|ENST00000339876.10
chr1	205076631	205076632	CNTN2|ENST00000331830.5
chr1	205163933	205163934	DSTYK|ENST00000367162.7
chr1	20742999	20743000	HP1BP3|ENST00000375003.6
chr1	212385393	212385394	TMEM206|ENST00000261455.8
chr1	212898857	212898858	FLVCR1|ENST00000366971.8
chr1	228097415	228097416	ARF1|ENST00000541182.1
chr1	230281208	230281209	GALNT2|ENST00000366672.4
chr1	23079668	23079669	KDM1A|ENST00000400181.8
chr1	23085713	23085714	LUZP1|ENST00000302291.8
chr1	235550166	235550167	GNG4|ENST00000391854.6
chr1	235552067	235552068	GNG4|ENST00000391854.6
chr1	237603074	237603075	RYR2|ENST00000366574.6
chr1	237603110	237603111	RYR2|ENST00000366574.6
chr1	237603135	237603136	RYR2|ENST00000366574.6
chr1	237603275	237603276	RYR2|ENST00000366574.6
chr1	237603294	237603295	RYR2|ENST00000366574.6
chr1	237603295	237603296	RYR2|ENST00000366574.6
chr1	241506091	241506092	FH|ENST00000366560.3
chr1	242377182	242377183	PLD5|ENST00000536534.6
chr1	243125389	243125390	CEP170|ENST00000366542.5
chr1	25962000	25962001	PAFAH2|ENST00000374282.7
chr1	31180637	31180638	NKAIN1|ENST00000373736.6
chr1	31180672	31180673	NKAIN1|ENST00000373736.6
chr1	32195488	32195489	TXLNA|ENST00000373609.1
chr1	32334446	32334447	MARCKSL1|ENST00000329421.7
chr1	32685550	32685551	RBBP4|ENST00000373493.9
chr1	32685550	32685551	SYNC|ENST00000409190.7
chr1	3625827	3625828	TPRG1L|ENST00000378344.6
chr1	37984188	37984189	SF3A3|ENST00000373019.4
chr1	39439398	39439399	MACF1|ENST00000564288.5
chr1	39453809	39453810	MACF1|ENST00000564288.5
chr1	43966739	43966740	IPO13|ENST00000372343.7
chr1	51791648	51791649	NRDC|ENST00000354831.11
chr1	51910211	51910212	RAB3B|ENST00000371655.3
chr1	52685560	52685561	COA7|ENST00000371538.4
chr1	54216342	54216343	MRPL37|ENST00000605337.5
chr1	54225682	54225683	SSBP3|ENST00000610401.4
chr1	6248539	6248540	GPR153|ENST00000377893.2
chr1	81505604	81505605	ADGRL2|ENST00000370728.5
chr1	8624339	8624340	RERE|ENST00000337907.7
chr1	91387230	91387231	HFM1|ENST00000370425.7
chr1	91387254	91387255	HFM1|ENST00000370425.7
chr1	91387259	91387260	HFM1|ENST00000370425.7
chr1	91387297	91387298	HFM1|ENST00000370425.7
chr1	91387361	91387362	HFM1|ENST00000370425.7
chr1	91387383	91387384	HFM1|ENST00000370425.7
chr1	91387447	91387448	HFM1|ENST00000370425.7
chr1	91387525	91387526	HFM1|ENST00000370425.7
chr1	91387557	91387558	HFM1|ENST00000370425.7
chr1	93129336	93129337	MTF2|ENST00000370298.8
chr1	93537698	93537699	FNBP1L|ENST00000260506.12
chr1	9755149	9755150	CLSTN1|ENST00000377298.8
chr10	100363501	100363502	SCD|ENST00000370355.2
chr10	103277496	103277497	INA|ENST00000369849.8
chr10	103602418	103602419	SH3PXD2A|ENST00000369774.8
chr10	106699249	106699250	SORCS1|ENST00000263054.10
chr10	110937129	110937130	SHOC2|ENST00000369452.8
chr10	124989640	124989641	CTBP2|ENST00000337195.9
chr10	129840396	129840397	EBF3|ENST00000368648.7
chr10	13634296	13634297	RP11-295P9.13|ENST00000601460.5
chr10	13657483	13657484	FRMD4A|ENST00000357447.6
chr10	15211917	15211918	FAM171A1|ENST00000378116.8
chr10	34360233	34360234	PARD3|ENST00000374789.7
chr10	48435917	48435918	MAPK8|ENST00000395611.7
chr10	48746028	48746029	WDFY4|ENST00000325239.10
chr10	52294201	52294202	PRKG1|ENST00000373980.8
chr10	6221443	6221444	PFKFB3|ENST00000379775.8
chr10	69369266	69369267	HK1|ENST00000360289.6
chr10	69389226	69389227	HK1|ENST00000360289.6
chr10	72066971	72066972	SPOCK2|ENST00000373109.6
chr10	72918507	72918508	OIT3|ENST00000334011.9
chr10	80520814	80520815	TSPAN14|ENST00000429989.7
chr10	95314484	95314485	SORBS1|ENST00000371247.6
chr10	96560210	96560211	TM9SF3|ENST00000371142.8
chr10	97432609	97432610	PGAM1|ENST00000334828.5
chr11	10508350	10508351	MTRNR2L8|ENST00000536684.2
chr11	10508898	10508899	MTRNR2L8|ENST00000536684.2
chr11	10508899	10508900	MTRNR2L8|ENST00000536684.2
chr11	117837916	117837917	FXYD6-FXYD2|ENST00000532984.1
chr11	117837916	117837917	FXYD6|ENST00000526014.5
chr11	118749951	118749952	DDX6|ENST00000620157.4
chr11	119051586	119051587	HYOU1|ENST00000617285.4
chr11	119305400	119305401	CBL|ENST00000264033.5
chr11	120457141	120457142	ARHGEF12|ENST00000397843.6
chr11	123059673	123059674	HSPA8|ENST00000534624.5
chr11	126425648	126425649	KIRREL3|ENST00000525144.6
chr11	1461479	1461480	BRSK2|ENST00000308219.13
chr11	2883408	2883409	CDKN1C|ENST00000414822.7
chr11	44934363	44934364	TP53I11|ENST00000533940.5
chr11	45242661	45242662	SYT13|ENST00000020926.7
chr11	46657124	46657125	ATG13|ENST00000359513.8
chr11	47467600	47467601	CELF1|ENST00000395290.6
chr11	61312061	61312062	DDB1|ENST00000301764.11
chr11	61344235	61344236	TKFC|ENST00000394900.7
chr11	61745897	61745898	DAGLA|ENST00000257215.9
chr11	61967385	61967386	FTH1|ENST00000273550.11
chr11	63750115	63750116	RTN3|ENST00000377819.9
chr11	65654978	65654979	RELA|ENST00000525693.5
chr11	66266484	66266485	KLC2|ENST00000394065.2
chr11	74103397	74103398	C2CD3|ENST00000334126.11
chr11	78222180	78222181	GAB2|ENST00000361507.4
chr11	7995271	7995272	EIF3F|ENST00000533626.5
chr11	85974714	85974715	PICALM|ENST00000526033.5
chr11	92354953	92354954	FAT3|ENST00000409404.6
chr12	104031628	104031629	GLT8D2|ENST00000360814.8
chr12	112194893	112194894	HECTD4|ENST00000377560.9
chr12	112279336	112279337	HECTD4|ENST00000377560.9
chr12	120438443	120438444	AL021546.6|ENST00000551806.1
chr12	14500600	14500601	ATF7IP|ENST00000261168.8
chr12	16548779	16548780	LMO3|ENST00000261169.10
chr12	19255149	19255150	PLEKHA5|ENST00000538714.5
chr12	20551465	20551466	PDE3A|ENST00000359062.3
chr12	20551471	20551472	PDE3A|ENST00000359062.3
chr12	20551472	20551473	PDE3A|ENST00000359062.3
chr12	20551473	20551474	PDE3A|ENST00000359062.3
chr12	20551528	20551529	PDE3A|ENST00000359062.3
chr12	20551536	20551537	PDE3A|ENST00000359062.3
chr12	21635583	21635584	LDHB|ENST00000396076.5
chr12	2940245	2940246	TULP3|ENST00000448120.6
chr12	32724125	32724126	DNM1L|ENST00000452533.6
chr12	4304741	4304742	CCND2|ENST00000261254.7
chr12	46359080	46359081	SLC38A2|ENST00000256689.9
chr12	49184896	49184897	TUBA1A|ENST00000301071.11
chr12	49184929	49184930	TUBA1A|ENST00000301071.11
chr12	49185228	49185229	TUBA1A|ENST00000301071.11
chr12	49185350	49185351	TUBA1A|ENST00000301071.11
chr12	49185384	49185385	TUBA1A|ENST00000301071.11
chr12	49185690	49185691	TUBA1A|ENST00000301071.11
chr12	49185692	49185693	TUBA1A|ENST00000301071.11
chr12	49185695	49185696	TUBA1A|ENST00000301071.11
chr12	49185696	49185697	TUBA1A|ENST00000301071.11
chr12	49185789	49185790	TUBA1A|ENST00000301071.11
chr12	49185834	49185835	TUBA1A|ENST00000301071.11
chr12	49186428	49186429	TUBA1A|ENST00000301071.11
chr12	49272452	49272453	TUBA1C|ENST00000301072.10
chr12	49273013	49273014	TUBA1C|ENST00000301072.10
chr12	50099513	50099514	SMARCD1|ENST00000394963.8
chr12	51976400	51976401	ACVR1B|ENST00000257963.8
chr12	55993814	55993815	RAB5B|ENST00000360299.9
chr12	56116763	56116764	RPL41|ENST00000546591.5
chr12	56172438	56172439	SMARCC2|ENST00000394023.7
chr12	56272330	56272331	CS|ENST00000548567.5
chr12	56272399	56272400	CS|ENST00000548567.5
chr12	56276020	56276021	CS|ENST00000548567.5
chr12	56328061	56328062	PAN2|ENST00000425394.6
chr12	56639150	56639151	ATP5B|ENST00000262030.7
chr12	57488176	57488177	ARHGAP9|ENST00000393797.6
chr12	57569335	57569336	KIF5A|ENST00000455537.6
chr12	57581527	57581528	KIF5A|ENST00000455537.6
chr12	57730574	57730575	AGAP2|ENST00000257897.7
chr12	57820738	57820739	CTDSP2|ENST00000398073.6
chr12	6536991	6536992	GAPDH|ENST00000229239.9
chr12	6538325	6538326	GAPDH|ENST00000229239.9
chr12	6570245	6570246	CHD4|ENST00000544484.5
chr12	6583028	6583029	CHD4|ENST00000544484.5
chr12	6770639	6770640	PTMS|ENST00000619580.4
chr12	6856737	6856738	USP5|ENST00000229268.12
chr12	6941768	6941769	ATN1|ENST00000356654.8
chr12	71755275	71755276	RAB21|ENST00000261263.4
chr12	76046842	76046843	NAP1L1|ENST00000618691.4
chr12	8932952	8932953	PHC1|ENST00000433083.6
chr12	93503039	93503040	MRPL42|ENST00000549982.5
chr12	93575071	93575072	SOCS2|ENST00000548537.1
chr12	9695409	9695410	CLEC2D|ENST00000290855.10
chr13	113094529	113094530	MCF2L|ENST00000397030.5
chr13	113636101	113636102	TFDP1|ENST00000375370.9
chr13	25469044	25469045	ATP8A2|ENST00000381655.6
chr13	35771571	35771572	DCLK1|ENST00000360631.7
chr13	35810888	35810889	DCLK1|ENST00000360631.7
chr13	39343480	39343481	LHFP|ENST00000379589.3
chr13	45341089	45341090	TPT1|ENST00000616577.4
chr13	99205946	99205947	UBAC2|ENST00000376440.6
chr14	100334798	100334799	WARS|ENST00000355338.6
chr14	102940120	102940121	CDC42BPB|ENST00000361246.6
chr14	21085774	21085775	ARHGEF40|ENST00000298694.8
chr14	21360870	21360871	SUPT16H|ENST00000216297.6
chr14	21403027	21403028	CHD8|ENST00000399982.6
chr14	21521181	21521182	SALL2|ENST00000614342.1
chr14	23033479	23033480	PSMB5|ENST00000361611.10
chr14	23033580	23033581	PSMB5|ENST00000361611.10
chr14	24306130	24306131	CIDEB|ENST00000336557.9
chr14	24306130	24306131	NOP9|ENST00000267425.7
chr14	39085785	39085786	SEC23A|ENST00000537403.5
chr14	50722534	50722535	NIN|ENST00000245441.9
chr14	55065535	55065536	MAPK1IP1L|ENST00000395468.8
chr14	69118657	69118658	DCAF5|ENST00000341516.9
chr14	70366723	70366724	SYNJ2BP-COX16|ENST00000621525.4
chr14	70366723	70366724	SYNJ2BP|ENST00000256366.5
chr14	70671273	70671274	TTC9|ENST00000256367.2
chr14	76791301	76791302	ANGEL1|ENST00000251089.6
chr14	81180039	81180040	GTF2A1|ENST00000553612.5
chr14	90407144	90407145	CALM1|ENST00000356978.8
chr14	92934854	92934855	CHGA|ENST00000216492.9
chr14	93223953	93223954	UBR7|ENST00000013070.10
chr14	94062384	94062385	DDX24|ENST00000621632.4
chr15	32641746	32641747	SCG5|ENST00000300175.8
chr15	38353522	38353523	SPRED1|ENST00000299084.8
chr15	40987875	40987876	INO80|ENST00000361937.7
chr15	42944716	42944717	UBR1|ENST00000290650.8
chr15	43469957	43469958	TP53BP1|ENST00000382044.8
chr15	43765495	43765496	PDIA3|ENST00000300289.9
chr15	51720778	51720779	SCG3|ENST00000220478.7
chr15	51720802	51720803	SCG3|ENST00000220478.7
chr15	59081090	59081091	RNF111|ENST00000348370.8
chr15	74597909	74597910	ARID3B|ENST00000346246.9
chr15	75505705	75505706	PTPN9|ENST00000618819.4
chr15	76932404	76932405	RCN2|ENST00000394885.7
chr15	77056150	77056151	TSPAN3|ENST00000267970.8
chr15	77111268	77111269	PEAK1|ENST00000560626.6
chr15	77180183	77180184	PEAK1|ENST00000560626.6
chr15	77181835	77181836	PEAK1|ENST00000560626.6
chr15	90271973	90271974	NGRN|ENST00000379095.4
chr15	90271973	90271974	RP11-697E2.12|ENST00000622269.1
chr15	99713009	99713010	MEF2A|ENST00000354410.9
chr16	14247477	14247478	MKL2|ENST00000571589.5
chr16	14875349	14875350	NOMO1|ENST00000287667.11
chr16	14880098	14880099	NOMO1|ENST00000287667.11
chr16	16274002	16274003	NOMO3|ENST00000399336.8
chr16	16278745	16278746	NOMO3|ENST00000399336.8
chr16	18433390	18433391	NOMO2|ENST00000330537.10
chr16	18515925	18515926	NOMO2|ENST00000330537.10
chr16	18520668	18520669	NOMO2|ENST00000330537.10
chr16	19699593	19699594	C16orf62|ENST00000251143.9
chr16	2056716	2056717	TSC2|ENST00000219476.7
chr16	2116599	2116600	PKD1|ENST00000262304.8
chr16	2298439	2298440	ABCA3|ENST00000301732.9
chr16	2600784	2600785	PDPK1|ENST00000342085.8
chr16	2763463	2763464	SRRM2|ENST00000301740.12
chr16	28323291	28323292	SBK1|ENST00000341901.4
chr16	29810527	29810528	MAZ|ENST00000219782.10
chr16	29814812	29814813	PRRT2|ENST00000300797.7
chr16	29873384	29873385	SEZ6L2|ENST00000308713.9
chr16	30029460	30029461	FAM57B|ENST00000380495.8
chr16	30351216	30351217	CD2BP2|ENST00000305596.7
chr16	30763475	30763476	RNF40|ENST00000324685.10
chr16	30766428	30766429	RNF40|ENST00000324685.10
chr16	31499347	31499348	C16orf58|ENST00000327237.6
chr16	54934364	54934365	IRX5|ENST00000394636.8
chr16	56451112	56451113	NUDT21|ENST00000300291.9
chr16	57152728	57152729	FAM192A|ENST00000309137.12
chr16	57153107	57153108	FAM192A|ENST00000309137.12
chr16	68297386	68297387	SLC7A6|ENST00000566454.5
chr16	70329947	70329948	DDX19B|ENST00000288071.10
chr16	70329947	70329948	RP11-529K1.3|ENST00000443119.7
chr16	70677868	70677869	MTSS1L|ENST00000338779.10
chr16	77971924	77971925	VAT1L|ENST00000302536.2
chr16	77977919	77977920	VAT1L|ENST00000302536.2
chr16	81388498	81388499	GAN|ENST00000568107.2
chr16	85078965	85078966	KIAA0513|ENST00000566428.5
chr16	8917064	8917065	USP7|ENST00000344836.8
chr16	89883413	89883414	TCF25|ENST00000263347.11
chr16	89911181	89911182	TCF25|ENST00000263347.11
chr16	89934926	89934927	RP11-566K11.2|ENST00000556922.1
chr16	89934926	89934927	TUBB3|ENST00000554444.5
chr16	89935074	89935075	RP11-566K11.2|ENST00000556922.1
chr16	89935074	89935075	TUBB3|ENST00000554444.5
chr17	19906061	19906062	AKAP10|ENST00000225737.10
chr17	21243404	21243405	NATD1|ENST00000611551.1
chr17	22524468	22524469	MTRNR2L1|ENST00000540040.2
chr17	30185926	30185927	NSRP1|ENST00000247026.9
chr17	32487734	32487735	CDK5R1|ENST00000313401.3
chr17	35151215	35151216	UNC45B|ENST00000268876.9
chr17	35657610	35657611	AP2B1|ENST00000621914.4
chr17	35723789	35723790	AP2B1|ENST00000621914.4
chr17	38764139	38764140	PSMB3|ENST00000619426.4
chr17	4006813	4006814	ZZEF1|ENST00000381638.6
chr17	40163871	40163872	CASC3|ENST00000264645.11
chr17	4164112	4164113	ANKFY1|ENST00000341657.8
chr17	41913822	41913823	ACLY|ENST00000352035.6
chr17	42315716	42315717	STAT3|ENST00000264657.9
chr17	43029102	43029103	RND2|ENST00000587250.3
chr17	43202700	43202701	NBR1|ENST00000341165.10
chr17	44082658	44082659	HDAC5|ENST00000225983.10
chr17	44852528	44852529	EFTUD2|ENST00000426333.6
chr17	45642956	45642957	CRHR1|ENST00000634540.1
chr17	45996631	45996632	MAPT|ENST00000344290.9
chr17	46330736	46330737	LRRC37A|ENST00000320254.5
chr17	46548598	46548599	AC138645.1|ENST00000622488.5
chr17	46548598	46548599	AC138645.2|ENST00000329240.9
chr17	46548598	46548599	LRRC37A2|ENST00000576629.5
chr17	48933291	48933292	SNF8|ENST00000502492.5
chr17	49512792	49512793	NGFR|ENST00000172229.7
chr17	49513251	49513252	NGFR|ENST00000172229.7
chr17	51160009	51160010	NME1-NME2|ENST00000555572.1
chr17	51160009	51160010	NME1|ENST00000511355.5
chr17	51161903	51161904	NME1-NME2|ENST00000555572.1
chr17	51161903	51161904	NME1|ENST00000511355.5
chr17	51168250	51168251	NME1-NME2|ENST00000555572.1
chr17	51168250	51168251	NME2|ENST00000393190.4
chr17	57974609	57974610	VEZF1|ENST00000258963.7
chr17	58998700	58998701	TRIM37|ENST00000262294.11
chr17	63592729	63592730	DCAF7|ENST00000614556.4
chr17	64860685	64860686	LRRC37A3|ENST00000584306.5
chr17	72742832	72742833	SLC39A11|ENST00000542342.6
chr17	7459415	7459416	ZBTB4|ENST00000311403.4
chr17	7511540	7511541	POLR2A|ENST00000617998.4
chr17	7577685	7577686	EIF4A1|ENST00000293831.12
chr17	76094296	76094297	EXOC7|ENST00000589210.5
chr17	76398900	76398901	UBE2O|ENST00000319380.11
chr17	76683903	76683904	MXRA7|ENST00000355797.7
chr17	7895390	7895391	CHD3|ENST00000380358.8
chr17	78976061	78976062	LGALS3BP|ENST00000262776.7
chr17	7899047	7899048	CHD3|ENST00000380358.8
chr17	81451689	81451690	BAHCC1|ENST00000584436.7
chr17	81510957	81510958	ACTG1|ENST00000575842.5
chr17	81511039	81511040	ACTG1|ENST00000575842.5
chr17	81512073	81512074	ACTG1|ENST00000575842.5
chr17	8379822	8379823	RPL26|ENST00000578812.5
chr17	8506417	8506418	MYH10|ENST00000360416.7
chr18	211684	211685	USP14|ENST00000261601.7
chr18	35247312	35247313	ZNF397|ENST00000330501.11
chr18	35990725	35990726	RPRD1A|ENST00000399022.8
chr18	58984204	58984205	ZNF532|ENST00000336078.8
chr18	68690433	68690434	TMX3|ENST00000299608.6
chr18	80137114	80137115	ADNP2|ENST00000262198.8
chr19	10987918	10987919	SMARCA4|ENST00000429416.7
chr19	11025435	11025436	SMARCA4|ENST00000429416.7
chr19	11035128	11035129	SMARCA4|ENST00000429416.7
chr19	11436058	11436059	PRKCSH|ENST00000591462.5
chr19	11449368	11449369	PRKCSH|ENST00000591462.5
chr19	1258688	1258689	MIDN|ENST00000300952.6
chr19	13135664	13135665	NACC1|ENST00000292431.4
chr19	1453324	1453325	APC2|ENST00000535453.5
chr19	16133182	16133183	RAB8A|ENST00000300935.7
chr19	16533057	16533058	CHERP|ENST00000546361.6
chr19	17274165	17274166	BABAM1|ENST00000359435.8
chr19	17618439	17618440	UNC13A|ENST00000519716.6
chr19	1776256	1776257	ONECUT3|ENST00000382349.4
chr19	17861456	17861457	RPL18A|ENST00000600147.5
chr19	18435875	18435876	ISYNA1|ENST00000338128.12
chr19	18617098	18617099	TMEM59L|ENST00000600490.5
chr19	18620523	18620524	TMEM59L|ENST00000600490.5
chr19	18863455	18863456	UPF1|ENST00000262803.9
chr19	18927850	18927851	DDX49|ENST00000629999.2
chr19	32384580	32384581	ZNF507|ENST00000311921.8
chr19	35746753	35746754	PSENEN|ENST00000587708.6
chr19	35871317	35871318	APLP1|ENST00000221891.8
chr19	36014795	36014796	CLIP3|ENST00000360535.8
chr19	36015949	36015950	CLIP3|ENST00000360535.8
chr19	38379253	38379254	PSMD8|ENST00000592035.5
chr19	3979351	3979352	EEF2|ENST00000309311.6
chr19	40232574	40232575	AKT2|ENST00000392038.6
chr19	40367821	40367822	PLD3|ENST00000409587.5
chr19	40757340	40757341	SNRPA|ENST00000243563.7
chr19	41564234	41564235	CEACAM21|ENST00000407170.6
chr19	42273705	42273706	CIC|ENST00000572681.6
chr19	42300268	42300269	PAFAH1B3|ENST00000538771.5
chr19	45641666	45641667	EML2|ENST00000536630.5
chr19	48383024	48383025	KDELR1|ENST00000597017.5
chr19	49009826	49009827	RUVBL2|ENST00000595090.5
chr19	51329658	51329659	IGLON5|ENST00000270642.8
chr19	53874107	53874108	MYADM|ENST00000391769.2
chr19	54106889	54106890	NDUFA3|ENST00000485876.5
chr19	55669159	55669160	U2AF2|ENST00000450554.6
chr19	5918600	5918601	RANBP3|ENST00000340578.10
chr19	7871188	7871189	PRR36|ENST00000618550.4
chr19	8404348	8404349	RAB11B|ENST00000328024.10
chr2	113951786	113951787	ACTR3|ENST00000263238.6
chr2	127703536	127703537	SFT2D3|ENST00000310981.5
chr2	127703536	127703537	WDR33|ENST00000322313.8
chr2	15620312	15620313	DDX1|ENST00000381341.6
chr2	1632261	1632262	PXDN|ENST00000252804.8
chr2	1643372	1643373	PXDN|ENST00000252804.8
chr2	1661001	1661002	PXDN|ENST00000252804.8
chr2	169950001	169950002	UBR3|ENST00000272793.9
chr2	170007038	170007039	UBR3|ENST00000272793.9
chr2	177221888	177221889	HNRNPA3|ENST00000411529.6
chr2	201632086	201632087	TMEM237|ENST00000409444.6
chr2	203440818	203440819	ABI2|ENST00000295851.9
chr2	203440818	203440819	RAPH1|ENST00000319170.9
chr2	206146964	206146965	NDUFS1|ENST00000233190.10
chr2	207078740	207078741	KLF7|ENST00000309446.10
chr2	210432993	210432994	LANCL1|ENST00000443314.5
chr2	218961473	218961474	CDK5R2|ENST00000302625.5
chr2	219563375	219563376	OBSL1|ENST00000404537.5
chr2	229358291	229358292	DNER|ENST00000341772.4
chr2	230875772	230875773	ITM2C|ENST00000326427.10
chr2	231072335	231072336	PSMD1|ENST00000308696.10
chr2	241256224	241256225	HDLBP|ENST00000391975.5
chr2	241352901	241352902	SEPT2|ENST00000391973.6
chr2	241353213	241353214	SEPT2|ENST00000391973.6
chr2	25247645	25247646	DNMT3A|ENST00000264709.7
chr2	26730971	26730972	KCNK3|ENST00000302909.3
chr2	26948050	26948051	DPYSL5|ENST00000288699.10
chr2	26949675	26949676	DPYSL5|ENST00000288699.10
chr2	26950328	26950329	DPYSL5|ENST00000288699.10
chr2	27435171	27435172	NRBP1|ENST00000233557.7
chr2	37008767	37008768	HEATR5B|ENST00000233099.5
chr2	54629359	54629360	SPTBN1|ENST00000615901.4
chr2	61872110	61872111	CCT4|ENST00000394440.7
chr2	69325068	69325069	GFPT1|ENST00000357308.8
chr2	70248464	70248465	TIA1|ENST00000433529.6
chr2	73250394	73250395	CCT7|ENST00000539919.5
chr2	74529146	74529147	AUP1|ENST00000377526.3
chr2	84906617	84906618	TMSB10|ENST00000233143.5
chr2	85318592	85318593	TGOLN2|ENST00000377386.7
chr2	86026519	86026520	POLR1A|ENST00000263857.10
chr2	86529281	86529282	CHMP3|ENST00000263856.8
chr2	86529281	86529282	RNF103-CHMP3|ENST00000604011.5
chr2	99593501	99593502	AFF3|ENST00000409236.6
chr20	25292435	25292436	PYGB|ENST00000216962.8
chr20	25300279	25300280	ABHD12|ENST00000339157.9
chr20	31538239	31538240	HM13|ENST00000498035.5
chr20	32000757	32000758	XKR7|ENST00000562532.2
chr20	32157895	32157896	TM9SF4|ENST00000217315.9
chr20	327829	327830	SOX12|ENST00000342665.4
chr20	32836735	32836736	MAPRE1|ENST00000375571.5
chr20	44752344	44752345	RIMS4|ENST00000372851.7
chr20	44752753	44752754	RIMS4|ENST00000372851.7
chr20	49114355	49114356	STAU1|ENST00000371856.6
chr20	50893714	50893715	ADNP|ENST00000396029.7
chr20	51598687	51598688	ATP9A|ENST00000338821.5
chr20	5190983	5190984	CDS2|ENST00000460006.5
chr20	58898956	58898957	GNAS|ENST00000371100.8
chr20	61928292	61928293	CDH4|ENST00000614565.4
chr20	63639807	63639808	STMN3|ENST00000540534.5
chr20	9538129	9538130	PAK5|ENST00000378429.3
chr21	14373754	14373755	HSPA13|ENST00000285667.3
chr21	33550251	33550252	SON|ENST00000356577.8
chr21	33551242	33551243	SON|ENST00000356577.8
chr21	33552709	33552710	SON|ENST00000356577.8
chr21	44104113	44104114	TRAPPC10|ENST00000291574.8
chr22	19357005	19357006	HIRA|ENST00000263208.5
chr22	19435896	19435897	MRPL40|ENST00000333130.3
chr22	19724604	19724605	GP1BB|ENST00000366425.3
chr22	19792625	19792626	GNB1L|ENST00000329517.10
chr22	20917602	20917603	CRKL|ENST00000354336.7
chr22	23261030	23261031	BCR|ENST00000305877.12
chr22	24313394	24313395	SPECC1L|ENST00000314328.13
chr22	37632839	37632840	GGA1|ENST00000406772.5
chr22	37877857	37877858	EIF3L|ENST00000412331.6
chr22	41358075	41358076	ZC3H7B|ENST00000352645.4
chr22	41524925	41524926	ACO2|ENST00000396512.3
chr22	41675022	41675023	SNU13|ENST00000401959.5
chr22	41996143	41996144	SEPT3|ENST00000396425.7
chr22	42090614	42090615	NDUFA6|ENST00000498737.6
chr22	42585868	42585869	POLDIP3|ENST00000451060.6
chr22	46701688	46701689	CERK|ENST00000216264.12
chr3	105575023	105575024	ALCAM|ENST00000306107.9
chr3	105658967	105658968	CBLB|ENST00000264122.8
chr3	108222133	108222134	IFT57|ENST00000264538.3
chr3	115720850	115720851	GAP43|ENST00000393780.3
chr3	12608828	12608829	RAF1|ENST00000251849.8
chr3	127027959	127027960	PLXNA1|ENST00000393409.2
chr3	127029952	127029953	PLXNA1|ENST00000393409.2
chr3	128620420	128620421	RPN1|ENST00000296255.7
chr3	128764977	128764978	RAB7A|ENST00000265062.7
chr3	12901218	12901219	IQSEC1|ENST00000273221.8
chr3	133637943	133637944	TOPBP1|ENST00000260810.9
chr3	135248480	135248481	EPHB1|ENST00000398015.7
chr3	138500184	138500185	CEP70|ENST00000264982.7
chr3	15050157	15050158	MRPS25|ENST00000253686.6
chr3	172764404	172764405	ECT2|ENST00000540509.5
chr3	184166910	184166911	DVL3|ENST00000313143.7
chr3	184315501	184315502	EIF4G1|ENST00000342981.8
chr3	184315769	184315770	EIF4G1|ENST00000342981.8
chr3	185657365	185657366	IGF2BP2|ENST00000382199.6
chr3	194402980	194402981	ATP13A3|ENST00000439040.5
chr3	196931581	196931582	SENP5|ENST00000323460.9
chr3	197954008	197954009	RPL35A|ENST00000464167.5
chr3	20101388	20101389	KAT2B|ENST00000263754.4
chr3	23919376	23919377	RPL15|ENST00000456530.6
chr3	39102869	39102870	GORASP1|ENST00000319283.7
chr3	41233345	41233346	CTNNB1|ENST00000349496.9
chr3	44442096	44442097	ZNF445|ENST00000396077.7
chr3	47414278	47414279	SCAP|ENST00000265565.9
chr3	47745975	47745976	SMARCC1|ENST00000254480.9
chr3	47781765	47781766	SMARCC1|ENST00000254480.9
chr3	47917089	47917090	MAP4|ENST00000426837.6
chr3	48660331	48660332	CELSR3|ENST00000164024.4
chr3	49012120	49012121	WDR6|ENST00000395474.7
chr3	49358141	49358142	GPX1|ENST00000419783.1
chr3	49532426	49532427	DAG1|ENST00000545947.5
chr3	49675707	49675708	APEH|ENST00000296456.9
chr3	50355541	50355542	TMEM115|ENST00000266025.3
chr3	50355541	50355542	XXcos-LUCA11.5|ENST00000606589.1
chr3	54899862	54899863	CACNA2D3|ENST00000474759.5
chr3	58270964	58270965	ABHD6|ENST00000478253.5
chr3	58293652	58293653	ABHD6|ENST00000478253.5
chr3	62370059	62370060	FEZF2|ENST00000283268.7
chr3	72378592	72378593	RYBP|ENST00000477973.2
chr3	96617305	96617306	MTRNR2L12|ENST00000600213.3
chr3	96617308	96617309	MTRNR2L12|ENST00000600213.3
chr3	96617397	96617398	MTRNR2L12|ENST00000600213.3
chr3	96617945	96617946	MTRNR2L12|ENST00000600213.3
chr3	96617946	96617947	MTRNR2L12|ENST00000600213.3
chr3	96618088	96618089	MTRNR2L12|ENST00000600213.3
chr3	98796317	98796318	DCBLD2|ENST00000326840.10
chr3	98796319	98796320	DCBLD2|ENST00000326840.10
chr3	98801644	98801645	DCBLD2|ENST00000326840.10
chr3	9944586	9944587	CRELD1|ENST00000383811.7
chr4	107631643	107631644	PAPSS1|ENST00000265174.4
chr4	113354126	113354127	ANK2|ENST00000357077.8
chr4	113354250	113354251	ANK2|ENST00000357077.8
chr4	113373312	113373313	ANK2|ENST00000357077.8
chr4	124666813	124666814	ANKRD50|ENST00000504087.5
chr4	1703696	1703697	SLBP|ENST00000489418.5
chr4	184628852	184628853	CASP3|ENST00000308394.8
chr4	22445027	22445028	ADGRA3|ENST00000334304.9
chr4	25002787	25002788	LGI2|ENST00000382114.8
chr4	31142837	31142838	PCDH7|ENST00000511884.6
chr4	48420145	48420146	SLAIN2|ENST00000264313.10
chr4	56356464	56356465	AASDH|ENST00000205214.10
chr4	57023479	57023480	POLR2B|ENST00000381227.5
chr4	5821419	5821420	CRMP1|ENST00000324989.11
chr4	5828523	5828524	CRMP1|ENST00000324989.11
chr4	61732838	61732839	ADGRL3|ENST00000512091.6
chr4	7058979	7058980	GRPEL1|ENST00000264954.4
chr4	73077069	73077070	ANKRD17|ENST00000358602.8
chr4	75774681	75774682	USO1|ENST00000264904.8
chr4	77713424	77713425	CNOT6L|ENST00000504123.5
chr4	84691778	84691779	WDFY3|ENST00000295888.8
chr4	90838884	90838885	CCSER1|ENST00000509176.5
chr4	98442243	98442244	RAP1GDS1|ENST00000408927.7
chr5	10258156	10258157	CCT5|ENST00000280326.8
chr5	109335993	109335994	PJA2|ENST00000361189.6
chr5	11346431	11346432	CTNND2|ENST00000304623.12
chr5	118973802	118973803	DTWD2|ENST00000304058.8
chr5	132896953	132896954	AFF4|ENST00000265343.9
chr5	134924343	134924344	PCBD2|ENST00000512783.5
chr5	134925480	134925481	PCBD2|ENST00000512783.5
chr5	137752482	137752483	HNRNPA0|ENST00000314940.6
chr5	141511019	141511020	PCDHGA10|ENST00000398610.2
chr5	141511019	141511020	PCDHGA11|ENST00000398587.6
chr5	141511019	141511020	PCDHGA12|ENST00000252085.3
chr5	141511019	141511020	PCDHGA1|ENST00000517417.2
chr5	141511019	141511020	PCDHGA2|ENST00000394576.2
chr5	141511019	141511020	PCDHGA3|ENST00000253812.7
chr5	141511019	141511020	PCDHGA4|ENST00000571252.2
chr5	141511019	141511020	PCDHGA5|ENST00000518069.1
chr5	141511019	141511020	PCDHGA7|ENST00000518325.1
chr5	141511019	141511020	PCDHGA9|ENST00000573521.1
chr5	141511019	141511020	PCDHGB1|ENST00000523390.1
chr5	141511019	141511020	PCDHGB2|ENST00000522605.1
chr5	141511019	141511020	PCDHGB3|ENST00000576222.1
chr5	141511019	141511020	PCDHGB5|ENST00000617380.1
chr5	141511019	141511020	PCDHGB7|ENST00000398594.3
chr5	141511019	141511020	PCDHGC3|ENST00000308177.4
chr5	141511019	141511020	PCDHGC4|ENST00000306593.1
chr5	141511019	141511020	PCDHGC5|ENST00000252087.2
chr5	142310647	142310648	SPRY4|ENST00000344120.4
chr5	142324864	142324865	SPRY4|ENST00000344120.4
chr5	147394134	147394135	DPYSL3|ENST00000343218.9
chr5	147418564	147418565	DPYSL3|ENST00000343218.9
chr5	147453612	147453613	DPYSL3|ENST00000343218.9
chr5	171387974	171387975	NPM1|ENST00000296930.9
chr5	172336490	172336491	SH3PXD2B|ENST00000311601.5
chr5	17275660	17275661	BASP1|ENST00000322611.3
chr5	179723722	179723723	CANX|ENST00000247461.8
chr5	3599614	3599615	IRX1|ENST00000302006.3
chr5	40832534	40832535	RPL37|ENST00000274242.9
chr5	43174648	43174649	ZNF131|ENST00000509634.5
chr5	43231731	43231732	NIM1K|ENST00000512796.1
chr5	43495486	43495487	C5orf34|ENST00000306862.6
chr5	43495488	43495489	C5orf34|ENST00000306862.6
chr5	43495489	43495490	C5orf34|ENST00000306862.6
chr5	43496190	43496191	C5orf34|ENST00000306862.6
chr5	480065	480066	SLC9A3|ENST00000264938.7
chr5	51383619	51383620	ISL1|ENST00000230658.11
chr5	69113220	69113221	SLC30A5|ENST00000396591.7
chr5	69386306	69386307	RAD17|ENST00000509734.5
chr5	72195741	72195742	MAP1B|ENST00000296755.11
chr5	72208823	72208824	MAP1B|ENST00000296755.11
chr5	72888223	72888224	TNPO1|ENST00000337273.9
chr5	73499165	73499166	BTF3|ENST00000380591.7
chr5	74628648	74628649	ENC1|ENST00000618628.4
chr5	80650118	80650119	DHFR|ENST00000439211.6
chr5	80650121	80650122	DHFR|ENST00000439211.6
chr5	80650900	80650901	DHFR|ENST00000439211.6
chr5	91163888	91163889	ADGRV1|ENST00000405460.6
chr5	93683690	93683691	FAM172A|ENST00000395965.7
chr6	107868667	107868668	SEC63|ENST00000369002.8
chr6	113860776	113860777	MARCKS|ENST00000612661.1
chr6	122726060	122726061	PKIB|ENST00000615438.4
chr6	130092804	130092805	L3MBTL3|ENST00000529410.5
chr6	132460838	132460839	STX7|ENST00000367941.6
chr6	133272960	133272961	EYA4|ENST00000367895.9
chr6	144371006	144371007	UTRN|ENST00000367545.7
chr6	158636652	158636653	DYNLT1|ENST00000367088.1
chr6	161135443	161135444	AGPAT4|ENST00000320285.8
chr6	163566269	163566270	QKI|ENST00000361752.7
chr6	166702085	166702086	RPS6KA2|ENST00000510118.5
chr6	21597830	21597831	SOX4|ENST00000244745.3
chr6	30608804	30608805	PPP1R10|ENST00000376511.6
chr6	30643640	30643641	ATAT1|ENST00000376483.8
chr6	31636823	31636824	PRRC2A|ENST00000376033.2
chr6	31639543	31639544	BAG6|ENST00000375964.10
chr6	3224619	3224620	TUBB2B|ENST00000259818.7
chr6	3227562	3227563	TUBB2B|ENST00000259818.7
chr6	33451946	33451947	SYNGAP1|ENST00000629380.2
chr6	33456356	33456357	SYNGAP1|ENST00000629380.2
chr6	33456356	33456357	ZBTB9|ENST00000395064.2
chr6	42564174	42564175	UBR2|ENST00000372899.5
chr6	53269236	53269237	ELOVL5|ENST00000370918.8
chr6	7301428	7301429	SSR1|ENST00000244763.8
chr6	73518410	73518411	EEF1A1|ENST00000316292.13
chr6	73518412	73518413	EEF1A1|ENST00000316292.13
chr6	73518413	73518414	EEF1A1|ENST00000316292.13
chr6	73519368	73519369	EEF1A1|ENST00000316292.13
chr6	73519396	73519397	EEF1A1|ENST00000316292.13
chr6	73519909	73519910	EEF1A1|ENST00000316292.13
chr6	8013926	8013927	BLOC1S5|ENST00000397457.6
chr6	85611495	85611496	SYNCRIP|ENST00000616122.4
chr6	89327558	89327559	UBE2J1|ENST00000435041.2
chr6	89932125	89932126	BACH2|ENST00000257749.8
chr7	100091921	100091922	COPS6|ENST00000303904.7
chr7	100175828	100175829	GPC2|ENST00000292377.3
chr7	100489336	100489337	NYAP1|ENST00000300179.6
chr7	100678501	100678502	GNB2|ENST00000303210.8
chr7	105112700	105112701	KMT2E|ENST00000311117.7
chr7	105457129	105457130	PUS7|ENST00000356362.6
chr7	128769801	128769802	CALU|ENST00000542996.6
chr7	129832940	129832941	UBE2H|ENST00000355621.7
chr7	132159575	132159576	PLXNA4|ENST00000359827.7
chr7	132164267	132164268	PLXNA4|ENST00000359827.7
chr7	132508377	132508378	PLXNA4|ENST00000359827.7
chr7	133035016	133035017	CHCHD3|ENST00000262570.9
chr7	134294375	134294376	SLC35B4|ENST00000378509.8
chr7	134294955	134294956	SLC35B4|ENST00000378509.8
chr7	149070620	149070621	ZNF786|ENST00000316286.13
chr7	150373492	150373493	REPIN1|ENST00000397281.6
chr7	22119554	22119555	RAPGEF5|ENST00000344041.10
chr7	23347674	23347675	IGF2BP3|ENST00000258729.7
chr7	2664610	2664611	TTYH3|ENST00000258796.11
chr7	30601116	30601117	GARS|ENST00000389266.7
chr7	38384047	38384048	AMPH|ENST00000356264.6
chr7	44701561	44701562	OGDH|ENST00000222673.5
chr7	5291785	5291786	SLC29A4|ENST00000396872.7
chr7	55432073	55432074	LANCL2|ENST00000254770.2
chr7	72926819	72926820	POM121|ENST00000395270.5
chr7	73536862	73536863	BCL7B|ENST00000223368.6
chr7	74965041	74965042	GATSL2|ENST00000616305.1
chr7	75441096	75441097	POM121C|ENST00000615331.4
chr7	75533893	75533894	HIP1|ENST00000336926.10
chr7	76066802	76066803	MDH2|ENST00000315758.9
chr7	76327299	76327300	YWHAG|ENST00000307630.4
chr7	98238579	98238580	TECPR1|ENST00000447648.6
chr7	99450371	99450372	ATP5J2-PTCD1|ENST00000413834.5
chr7	99450371	99450372	CPSF4|ENST00000436336.6
chr8	100709526	100709527	PABPC1|ENST00000318607.9
chr8	102651181	102651182	KLF10|ENST00000395884.3
chr8	102836317	102836318	AZIN1|ENST00000337198.9
chr8	109579821	109579822	SYBU|ENST00000399066.7
chr8	11847803	11847804	CTSB|ENST00000353047.10
chr8	124543235	124543236	NDUFB9|ENST00000522532.5
chr8	143650529	143650530	ZNF623|ENST00000501748.3
chr8	143992769	143992770	GRINA|ENST00000313269.5
chr8	22003249	22003250	XPO7|ENST00000252512.13
chr8	22420977	22420978	SLC39A14|ENST00000359741.9
chr8	24914381	24914382	NEFM|ENST00000221166.9
chr8	24914544	24914545	NEFM|ENST00000221166.9
chr8	24914570	24914571	NEFM|ENST00000221166.9
chr8	24914808	24914809	NEFM|ENST00000221166.9
chr8	24914860	24914861	NEFM|ENST00000221166.9
chr8	24914866	24914867	NEFM|ENST00000221166.9
chr8	24917115	24917116	NEFM|ENST00000221166.9
chr8	24917734	24917735	NEFM|ENST00000221166.9
chr8	24917773	24917774	NEFM|ENST00000221166.9
chr8	24917812	24917813	NEFM|ENST00000221166.9
chr8	24917851	24917852	NEFM|ENST00000221166.9
chr8	24918603	24918604	NEFM|ENST00000221166.9
chr8	24918895	24918896	NEFM|ENST00000221166.9
chr8	24919012	24919013	NEFM|ENST00000221166.9
chr8	24951202	24951203	NEFL|ENST00000610854.1
chr8	24951343	24951344	NEFL|ENST00000610854.1
chr8	24952638	24952639	NEFL|ENST00000610854.1
chr8	24955822	24955823	NEFL|ENST00000610854.1
chr8	24956002	24956003	NEFL|ENST00000610854.1
chr8	24956241	24956242	NEFL|ENST00000610854.1
chr8	26634829	26634830	DPYSL2|ENST00000521913.6
chr8	28567111	28567112	FZD3|ENST00000537916.2
chr8	30384642	30384643	RBPMS|ENST00000320203.8
chr8	32760264	32760265	NRG1|ENST00000356819.7
chr8	38381810	38381811	WHSC1L1|ENST00000317025.12
chr8	38428357	38428358	FGFR1|ENST00000341462.8
chr8	69690117	69690118	SLCO5A1|ENST00000260126.8
chr8	69690137	69690138	SLCO5A1|ENST00000260126.8
chr8	69690138	69690139	SLCO5A1|ENST00000260126.8
chr8	69690143	69690144	SLCO5A1|ENST00000260126.8
chr8	69690144	69690145	SLCO5A1|ENST00000260126.8
chr8	69690155	69690156	SLCO5A1|ENST00000260126.8
chr8	69690173	69690174	SLCO5A1|ENST00000260126.8
chr8	69690175	69690176	SLCO5A1|ENST00000260126.8
chr8	69690201	69690202	SLCO5A1|ENST00000260126.8
chr8	69690212	69690213	SLCO5A1|ENST00000260126.8
chr8	69690217	69690218	SLCO5A1|ENST00000260126.8
chr8	69690224	69690225	SLCO5A1|ENST00000260126.8
chr8	69690234	69690235	SLCO5A1|ENST00000260126.8
chr8	69690250	69690251	SLCO5A1|ENST00000260126.8
chr8	69690324	69690325	SLCO5A1|ENST00000260126.8
chr8	69690341	69690342	SLCO5A1|ENST00000260126.8
chr8	70112137	70112138	NCOA2|ENST00000452400.6
chr8	70273405	70273406	NCOA2|ENST00000452400.6
chr8	72937934	72937935	KCNB2|ENST00000523207.1
chr8	74365091	74365092	GDAP1|ENST00000220822.11
chr8	79665124	79665125	STMN2|ENST00000220876.11
chr8	80037036	80037037	TPD52|ENST00000448733.3
chr8	80487725	80487726	ZBTB10|ENST00000430430.5
chr8	90996660	90996661	TMEM55A|ENST00000285419.7
chr8	91960400	91960401	RUNX1T1|ENST00000613302.4
chr8	93924473	93924474	PDP1|ENST00000396200.3
chr8	99233467	99233468	VPS13B|ENST00000358544.6
chr9	105534515	105534516	FSD1L|ENST00000374710.7
chr9	112222563	112222564	PTBP3|ENST00000458258.5
chr9	124356296	124356297	PSMB7|ENST00000259457.7
chr9	124517901	124517902	NR6A1|ENST00000487099.6
chr9	124519003	124519004	NR6A1|ENST00000487099.6
chr9	124521975	124521976	NR6A1|ENST00000487099.6
chr9	128695365	128695366	SET|ENST00000322030.12
chr9	128959089	128959090	NUP188|ENST00000372577.2
chr9	130233124	130233125	NCS1|ENST00000372398.5
chr9	131485107	131485108	PRRC2B|ENST00000357304.8
chr9	131487200	131487201	PRRC2B|ENST00000357304.8
chr9	132928923	132928924	TSC1|ENST00000298552.7
chr9	134050494	134050495	BRD3|ENST00000303407.11
chr9	135503938	135503939	MRPS2|ENST00000371785.5
chr9	34398799	34398800	FAM219A|ENST00000445726.5
chr9	34557624	34557625	CNTFR|ENST00000378980.7
chr9	35376044	35376045	UNC13B|ENST00000635942.1
chr9	35752761	35752762	RGP1|ENST00000378078.4
chr9	36338608	36338609	RNF38|ENST00000357058.7
chr9	36375933	36375934	RNF38|ENST00000357058.7
chr9	37438386	37438387	ZBTB5|ENST00000307750.4
chr9	69428211	69428212	APBA1|ENST00000265381.6
chr9	8449757	8449758	PTPRD|ENST00000381196.8
chr9	84702401	84702402	NTRK2|ENST00000277120.7
chr9	88478241	88478242	SPIN1|ENST00000375859.3
chr9	93676670	93676671	PHF2|ENST00000359246.8
chrM	11211	11212	MT-ND4|ENST00000361381.2
chrM	11669	11670	MT-ND4|ENST00000361381.2
chrM	12599	12600	MT-ND5|ENST00000361567.2
chrM	13314	13315	MT-ND5|ENST00000361567.2
chrM	13580	13581	MT-ND5|ENST00000361567.2
chrM	14451	14452	MT-ND6|ENST00000361681.2
chrM	4501	4502	MT-ND2|ENST00000361453.3
chrM	5161	5162	MT-ND2|ENST00000361453.3
chrM	5922	5923	MT-CO1|ENST00000361624.2
chrM	5955	5956	MT-CO1|ENST00000361624.2
chrM	5992	5993	MT-CO1|ENST00000361624.2
chrM	6018	6019	MT-CO1|ENST00000361624.2
chrM	6037	6038	MT-CO1|ENST00000361624.2
chrM	6090	6091	MT-CO1|ENST00000361624.2
chrM	6230	6231	MT-CO1|ENST00000361624.2
chrM	6321	6322	MT-CO1|ENST00000361624.2
chrM	6388	6389	MT-CO1|ENST00000361624.2
chrM	6523	6524	MT-CO1|ENST00000361624.2
chrM	6589	6590	MT-CO1|ENST00000361624.2
chrM	6661	6662	MT-CO1|ENST00000361624.2
chrM	6702	6703	MT-CO1|ENST00000361624.2
chrM	6778	6779	MT-CO1|ENST00000361624.2
chrM	6810	6811	MT-CO1|ENST00000361624.2
chrM	6813	6814	MT-CO1|ENST00000361624.2
chrM	6829	6830	MT-CO1|ENST00000361624.2
chrM	6832	6833	MT-CO1|ENST00000361624.2
chrM	6856	6857	MT-CO1|ENST00000361624.2
chrM	6861	6862	MT-CO1|ENST00000361624.2
chrM	6862	6863	MT-CO1|ENST00000361624.2
chrM	6892	6893	MT-CO1|ENST00000361624.2
chrM	6896	6897	MT-CO1|ENST00000361624.2
chrM	6967	6968	MT-CO1|ENST00000361624.2
chrM	6970	6971	MT-CO1|ENST00000361624.2
chrM	7037	7038	MT-CO1|ENST00000361624.2
chrM	7056	7057	MT-CO1|ENST00000361624.2
chrM	7069	7070	MT-CO1|ENST00000361624.2
chrM	7121	7122	MT-CO1|ENST00000361624.2
chrM	7219	7220	MT-CO1|ENST00000361624.2
chrM	7235	7236	MT-CO1|ENST00000361624.2
chrM	7260	7261	MT-CO1|ENST00000361624.2
chrM	7267	7268	MT-CO1|ENST00000361624.2
chrM	7268	7269	MT-CO1|ENST00000361624.2
chrM	7269	7270	MT-CO1|ENST00000361624.2
chrM	7270	7271	MT-CO1|ENST00000361624.2
chrM	7274	7275	MT-CO1|ENST00000361624.2
chrM	7277	7278	MT-CO1|ENST00000361624.2
chrM	7278	7279	MT-CO1|ENST00000361624.2
chrM	7296	7297	MT-CO1|ENST00000361624.2
chrM	7297	7298	MT-CO1|ENST00000361624.2
chrM	7300	7301	MT-CO1|ENST00000361624.2
chrM	7372	7373	MT-CO1|ENST00000361624.2
chrM	7382	7383	MT-CO1|ENST00000361624.2
chrM	7389	7390	MT-CO1|ENST00000361624.2
chrM	7435	7436	MT-CO1|ENST00000361624.2
chrM	7875	7876	MT-CO2|ENST00000361739.1
chrM	8256	8257	MT-CO2|ENST00000361739.1
chrM	9011	9012	MT-ATP6|ENST00000361899.2
chrM	9074	9075	MT-ATP6|ENST00000361899.2
chrM	9183	9184	MT-ATP6|ENST00000361899.2
chrM	9400	9401	MT-CO3|ENST00000362079.2
chrM	9405	9406	MT-CO3|ENST00000362079.2
chrM	9645	9646	MT-CO3|ENST00000362079.2
chrM	9650	9651	MT-CO3|ENST00000362079.2
chrM	9671	9672	MT-CO3|ENST00000362079.2
chrM	9832	9833	MT-CO3|ENST00000362079.2
chrM	9853	9854	MT-CO3|ENST00000362079.2
chrM	9873	9874	MT-CO3|ENST00000362079.2
chrX	107563182	107563183	FRMPD3|ENST00000276185.8
chrX	111222802	111222803	PAK3|ENST00000372007.9
chrX	111294870	111294871	DCX|ENST00000358070.9
chrX	111300872	111300873	DCX|ENST00000358070.9
chrX	12976828	12976829	TMSB4X|ENST00000380636.1
chrX	12977021	12977022	TMSB4X|ENST00000380636.1
chrX	12977089	12977090	TMSB4X|ENST00000380636.1
chrX	134796435	134796436	FAM122B|ENST00000343004.9
chrX	13783463	13783464	GPM6B|ENST00000454189.6
chrX	13817200	13817201	GPM6B|ENST00000454189.6
chrX	153808559	153808560	PDZD4|ENST00000393758.6
chrX	21551534	21551535	CNKSR2|ENST00000425654.6
chrX	2906793	2906794	ARSD|ENST00000381154.5
chrX	2908771	2908772	ARSD|ENST00000381154.5
chrX	41518052	41518053	CASK|ENST00000421587.6
chrX	47144702	47144703	NDUFB11|ENST00000377811.3
chrX	53533124	53533125	HUWE1|ENST00000342160.7
chrX	54811311	54811312	MAGED2|ENST00000375068.5
chrX	65739182	65739183	MSN|ENST00000360270.6
chrX	75303457	75303458	UPRT|ENST00000373379.5
chrX	76429580	76429581	MAGEE1|ENST00000361470.3
chrX	77968787	77968788	ATP7A|ENST00000341514.10
chrX	81297483	81297484	SH3BGRL|ENST00000373212.5
chrX	8529884	8529885	ANOS1|ENST00000262648.7
chrX	91877021	91877022	PCDH11X|ENST00000373094.5
chrX	92113575	92113576	PCDH11X|ENST00000373094.5
chrY	5098455	5098456	PCDH11Y|ENST00000400457.3
